# Supplementary material for: Synthesis and evaluation of the anticancer activity of albiziabioside A and its analogues as apoptosis inducers against human melanoma cells
Source: Royal Society of Chemistry journal article supplement (doi:10.1039/c4ob00874j), 2014-06-11
Supplement: c4ob00874j1.pdf [file c4ob00874j1.pdf]

| Parameter                | Value          |
|--------------------------|----------------|
| 1 Spectrometer           | spect          |
| 2 Solvent                | CDC13          |
| 3 Temperature            | 297.9          |
| 4 Pulse Sequence         | zg30           |
| 5 Experiment             | 1D             |
| 6 Acquisition Time       | 2.6564         |
| 7 Spectrometer Frequency | 600.13         |
| 8 Spectral Width         | 12335.5        |
| 9 Lowest Frequency       | -2478.5        |
| 10 Nucleus               | <sup>1</sup> H |
| 11 Acquired Size         | 32768          |
| 12 Spectral Size         | 65536          |

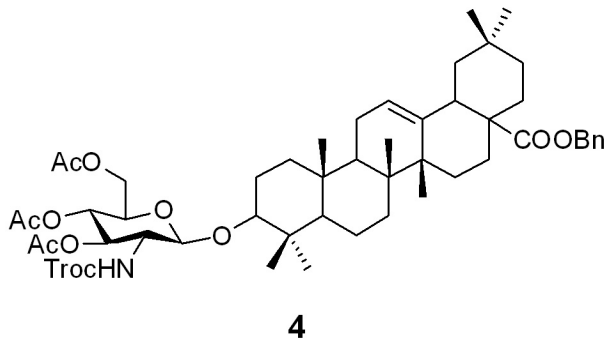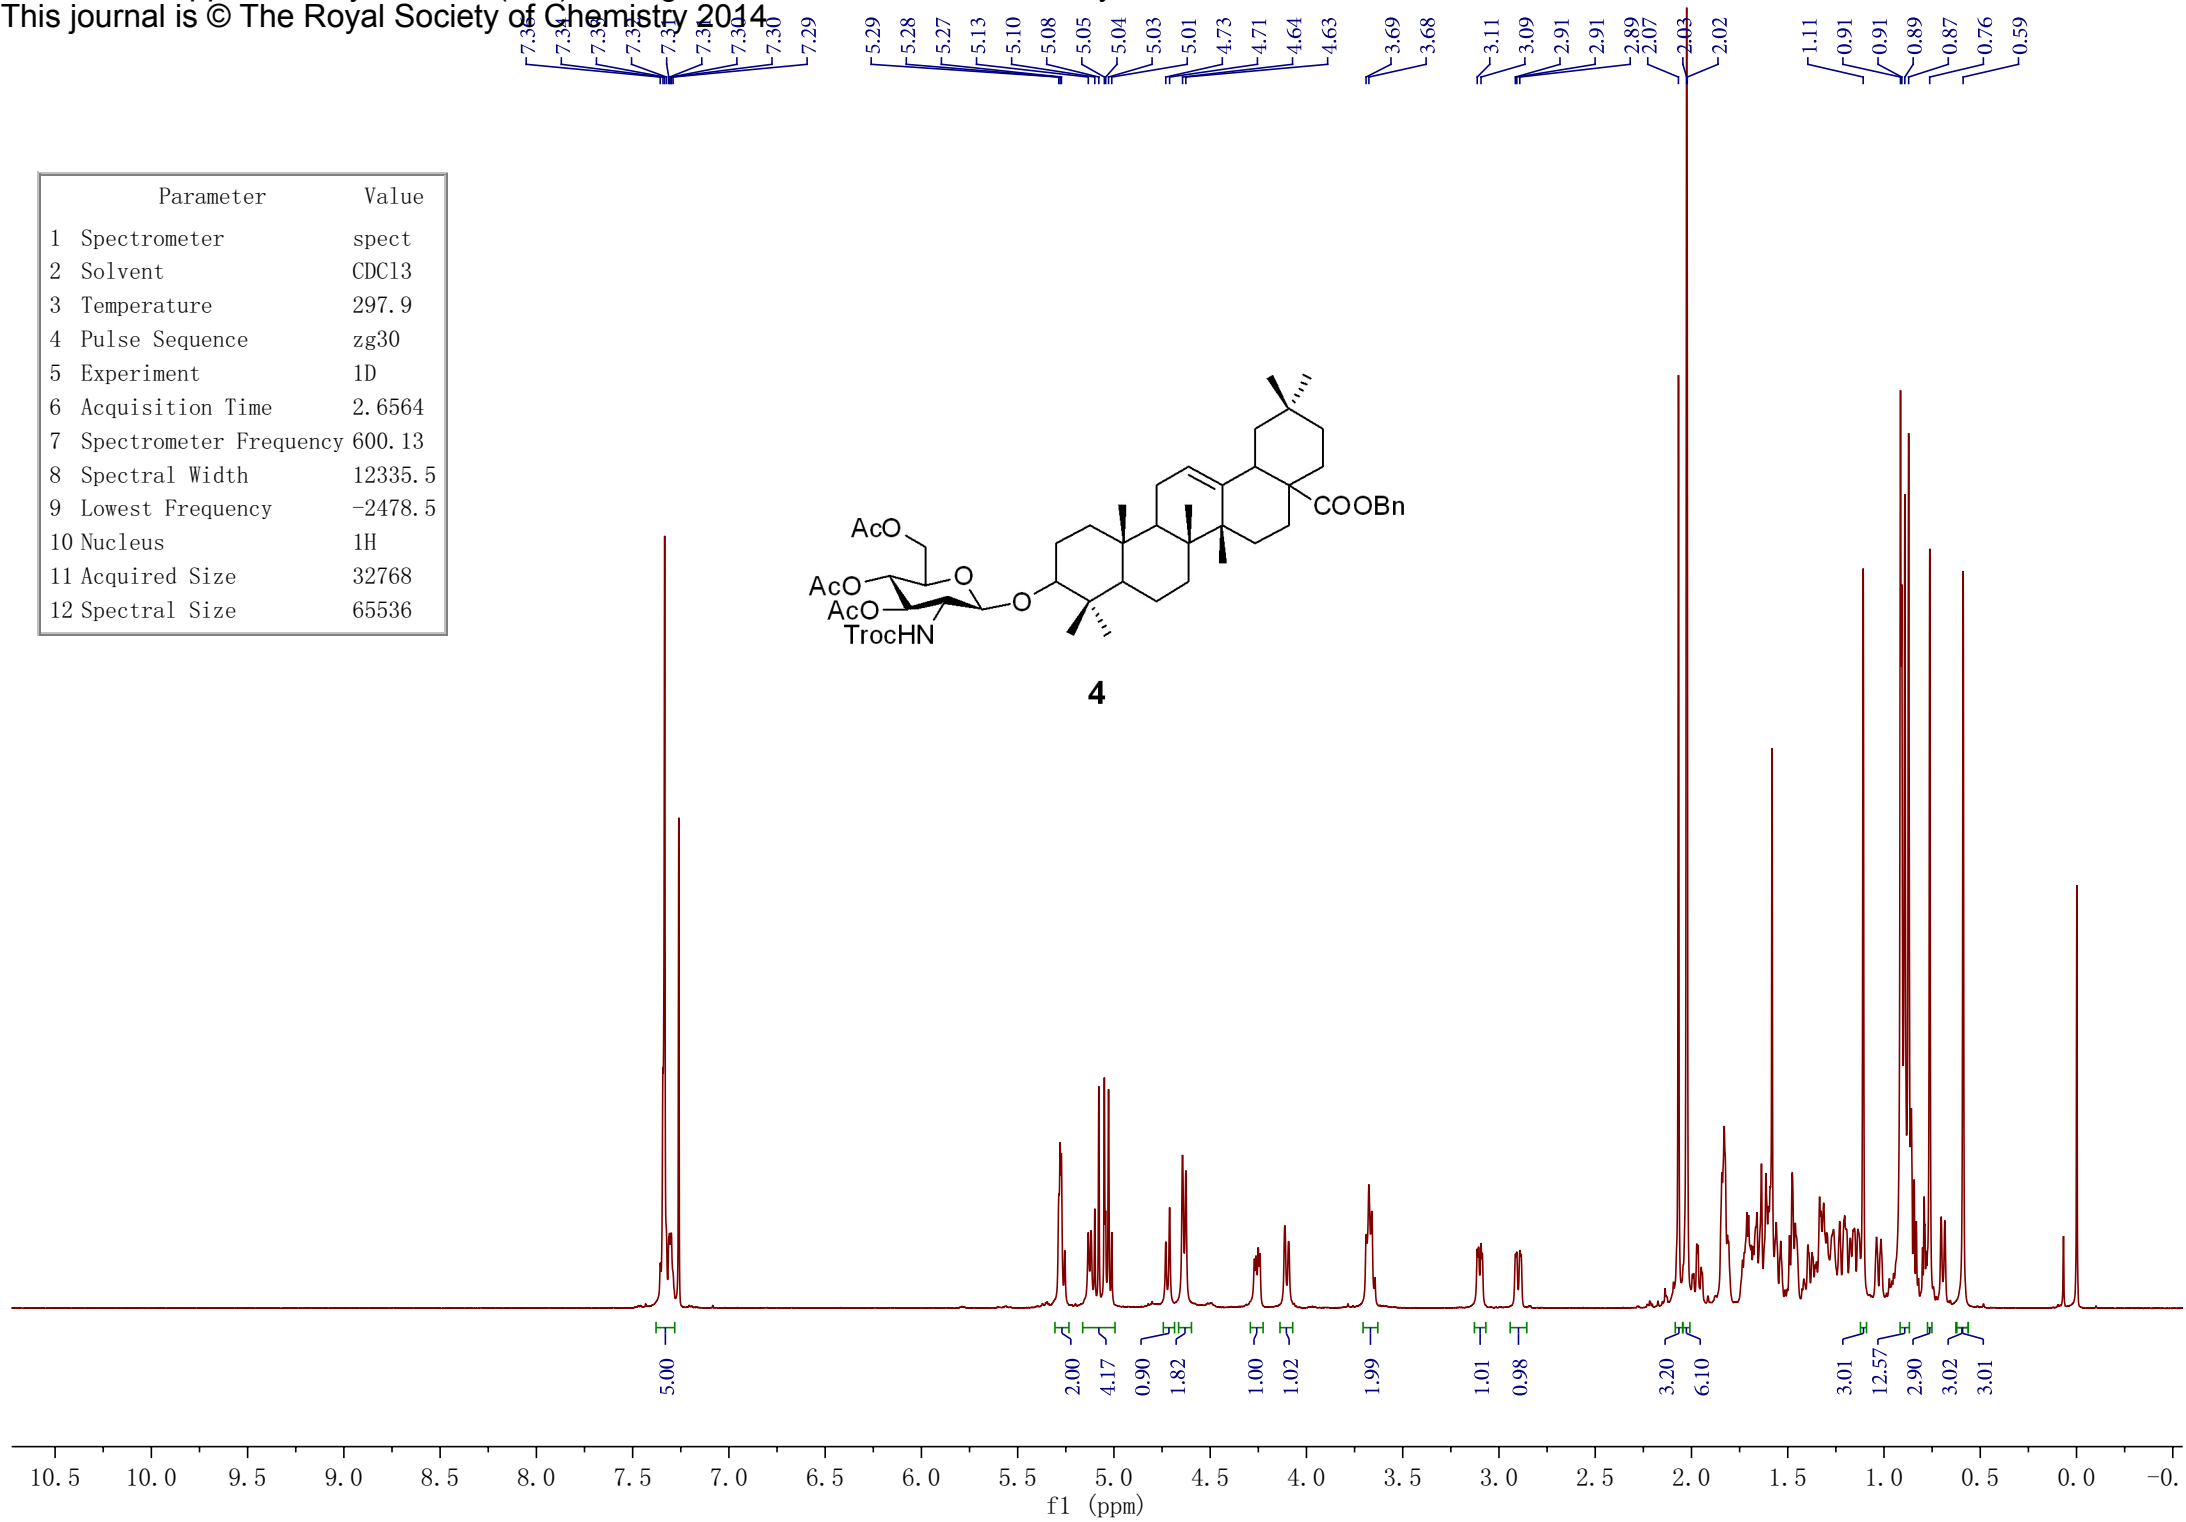

| Parameter                | Value           |
|--------------------------|-----------------|
| 1 Spectrometer           | spect           |
| 2 Solvent                | CDC13           |
| 3 Temperature            | 297.9           |
| 4 Pulse Sequence         | zgpg30          |
| 5 Experiment             | 1D              |
| 6 Acquisition Time       | 0.8651          |
| 7 Spectrometer Frequency | 150.92          |
| 8 Spectral Width         | 37878.8         |
| 9 Lowest Frequency       | -1564.4         |
| 10 Nucleus               | <sup>13</sup> C |
| 11 Acquired Size         | 32768           |
| 12 Spectral Size         | 65536           |

177.55  
 170.89  
 170.78  
 169.60  
 153.98  
 143.87  
 136.55  
 128.55  
 128.13  
 128.06  
 122.61  
 103.23  
 95.33  
 91.01  
 74.83  
 72.05  
 71.66  
 69.09  
 66.09  
 62.53  
 56.96  
 55.64  
 47.77  
 46.88  
 46.05  
 41.82  
 41.53  
 39.45  
 39.08  
 38.57  
 36.85  
 34.00  
 33.25  
 32.84  
 32.51  
 30.85  
 28.22  
 27.75  
 26.00  
 25.85  
 23.80  
 23.56  
 23.19  
 22.81  
 20.92  
 20.80  
 18.33  
 17.01  
 16.59  
 15.40

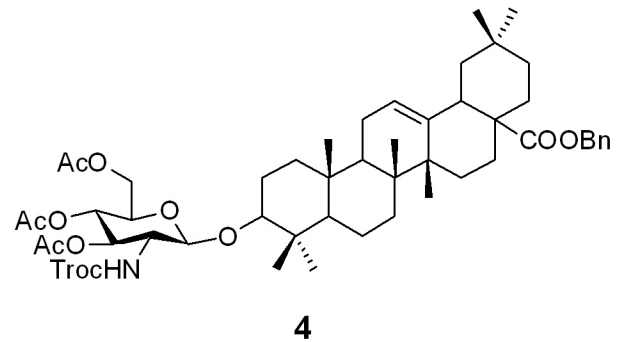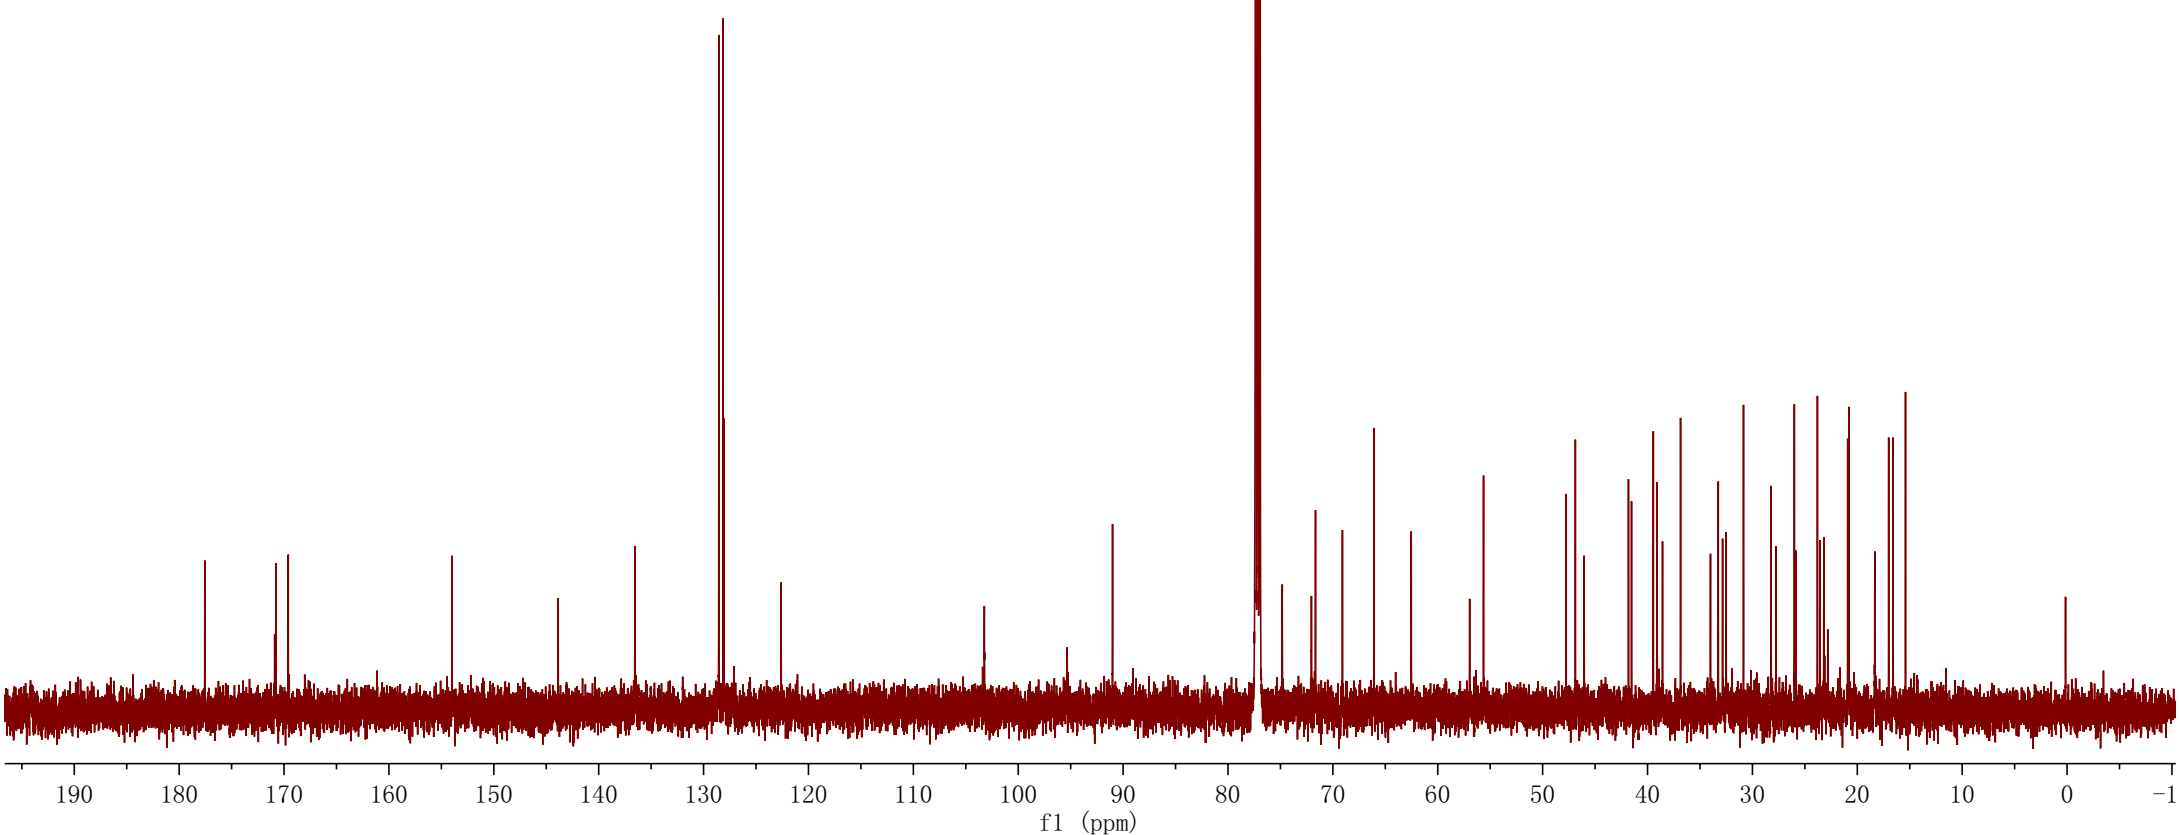

| Parameter                | Value   |
|--------------------------|---------|
| 1 Spectrometer           | spect   |
| 2 Solvent                | CDC13   |
| 3 Temperature            | 297.9   |
| 4 Pulse Sequence         | zg30    |
| 5 Experiment             | 1D      |
| 6 Acquisition Time       | 2.6564  |
| 7 Spectrometer Frequency | 600.13  |
| 8 Spectral Width         | 12335.5 |
| 9 Lowest Frequency       | -2478.8 |
| 10 Nucleus               | 1H      |
| 11 Acquired Size         | 32768   |
| 12 Spectral Size         | 65536   |

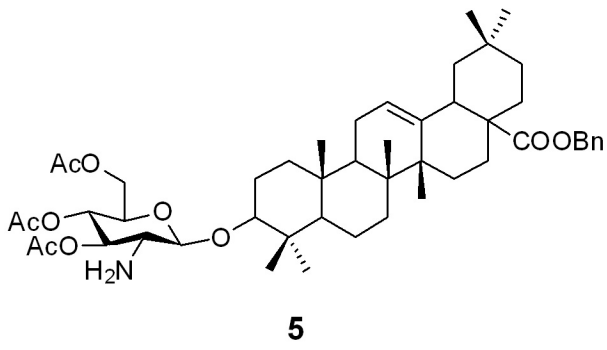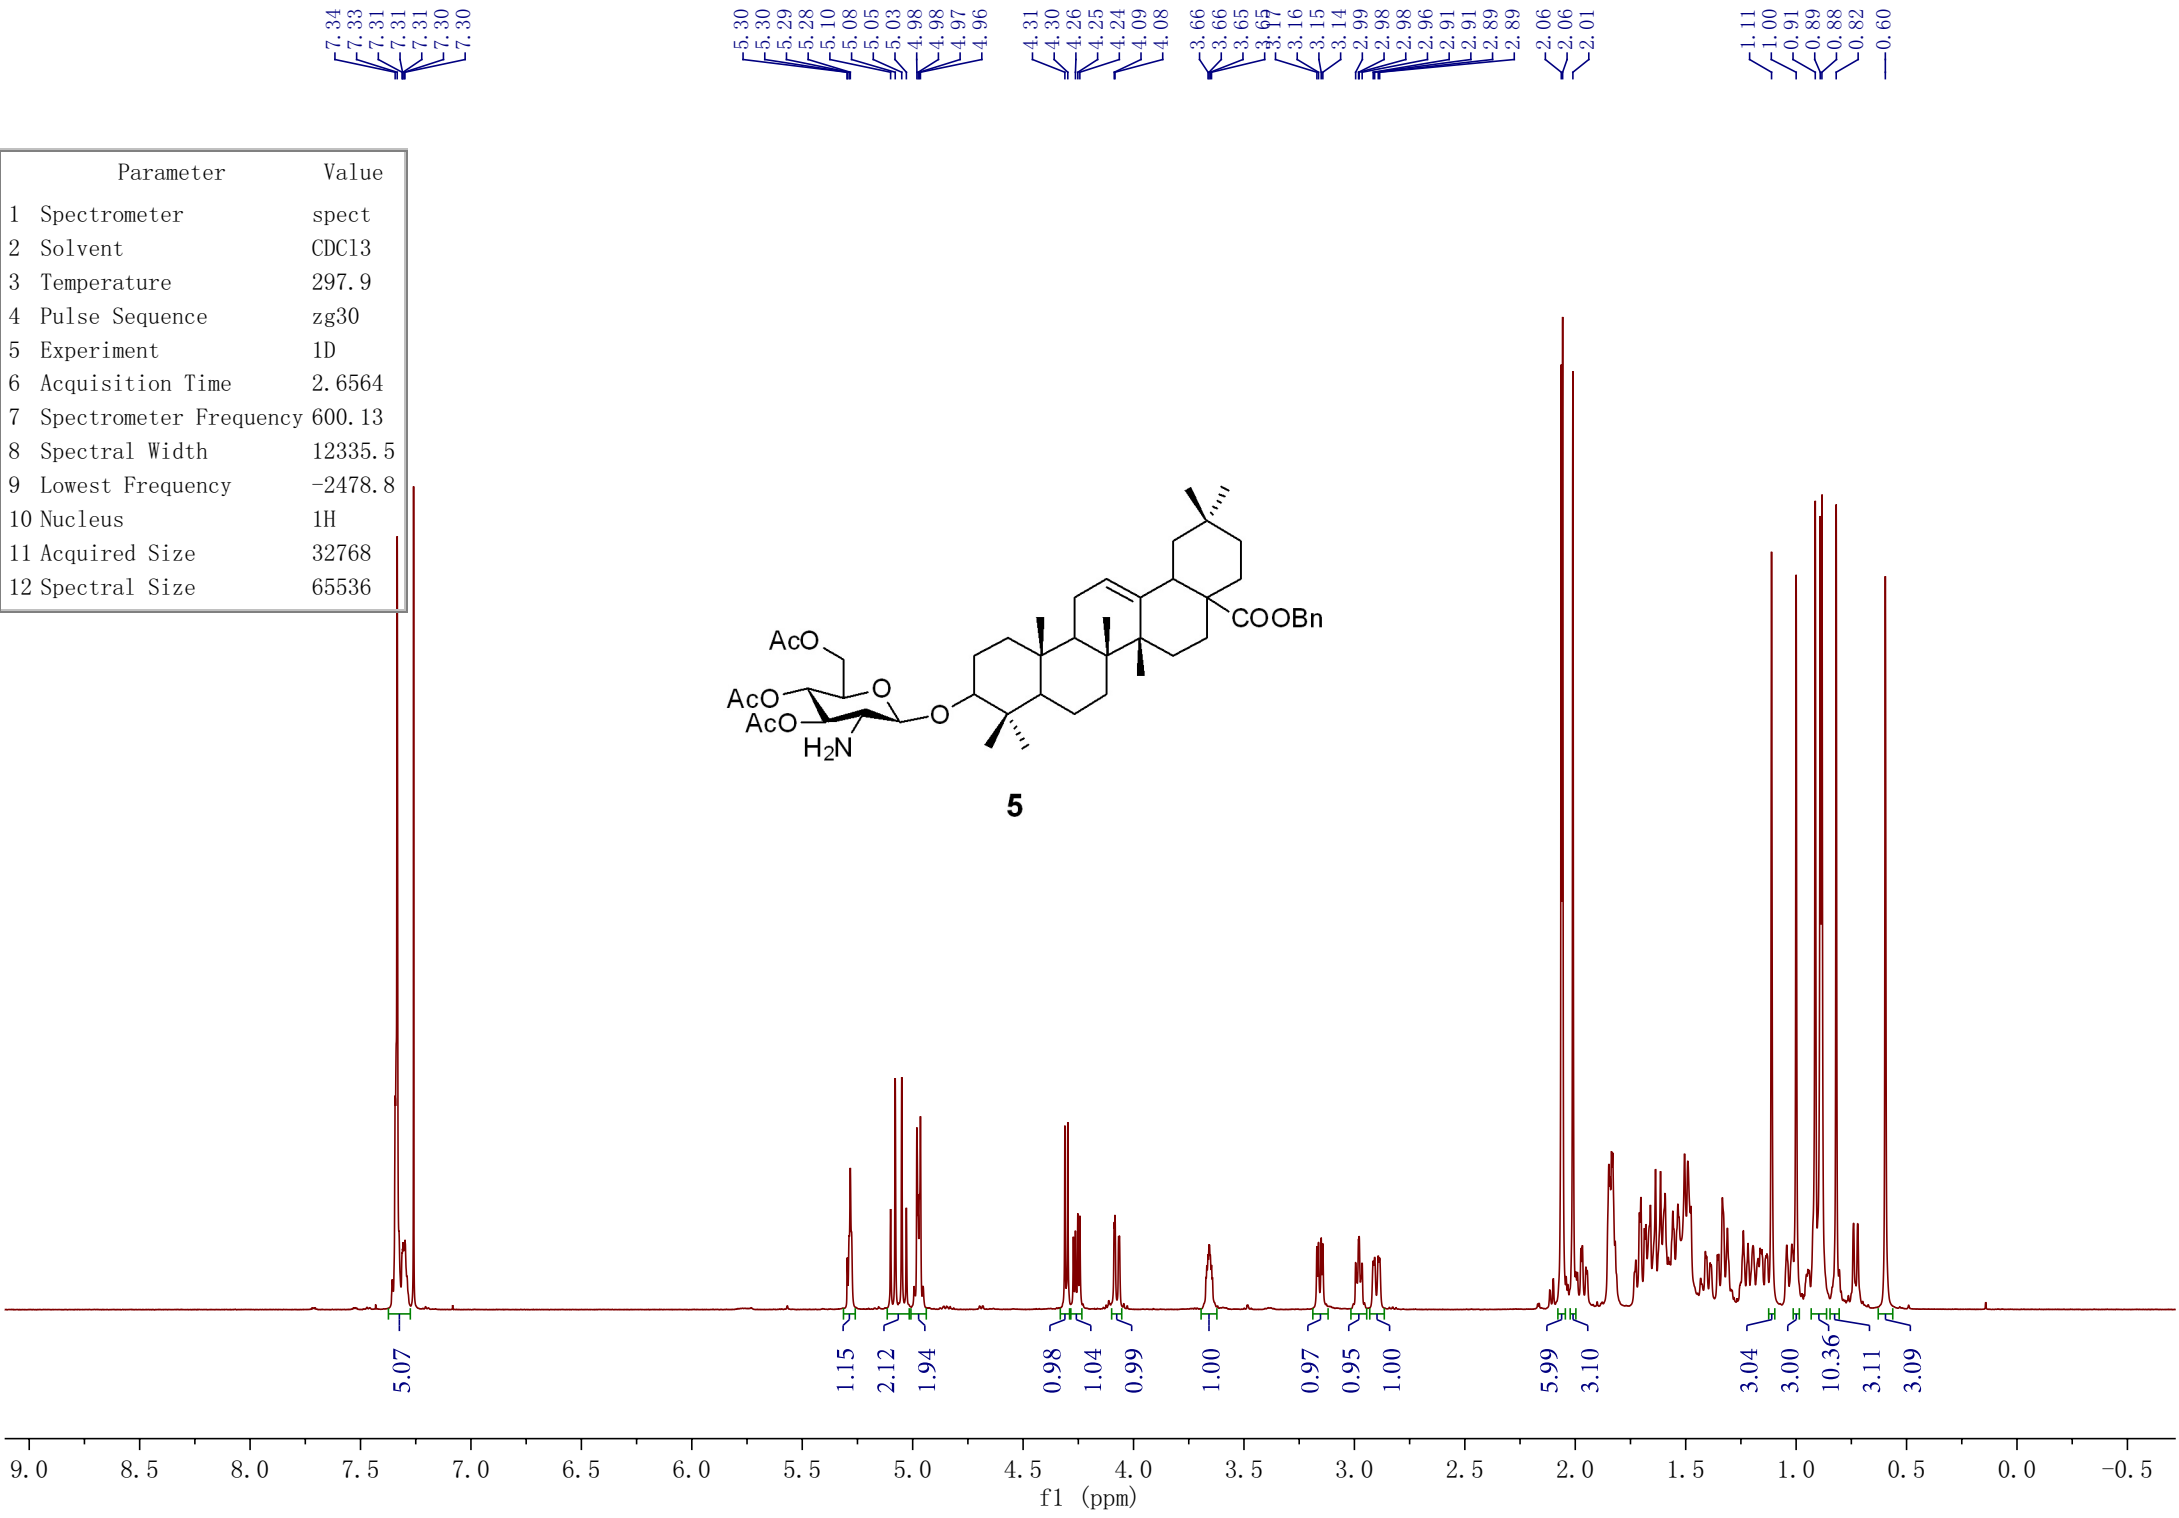

| Parameter                | Value           |
|--------------------------|-----------------|
| 1 Spectrometer           | spect           |
| 2 Solvent                | CDC13           |
| 3 Temperature            | 297.9           |
| 4 Pulse Sequence         | zgpg30          |
| 5 Experiment             | 1D              |
| 6 Acquisition Time       | 0.9044          |
| 7 Spectrometer Frequency | 150.90          |
| 8 Spectral Width         | 36231.9         |
| 9 Lowest Frequency       | -3041.0         |
| 10 Nucleus               | <sup>13</sup> C |
| 11 Acquired Size         | 32768           |
| 12 Spectral Size         | 65536           |

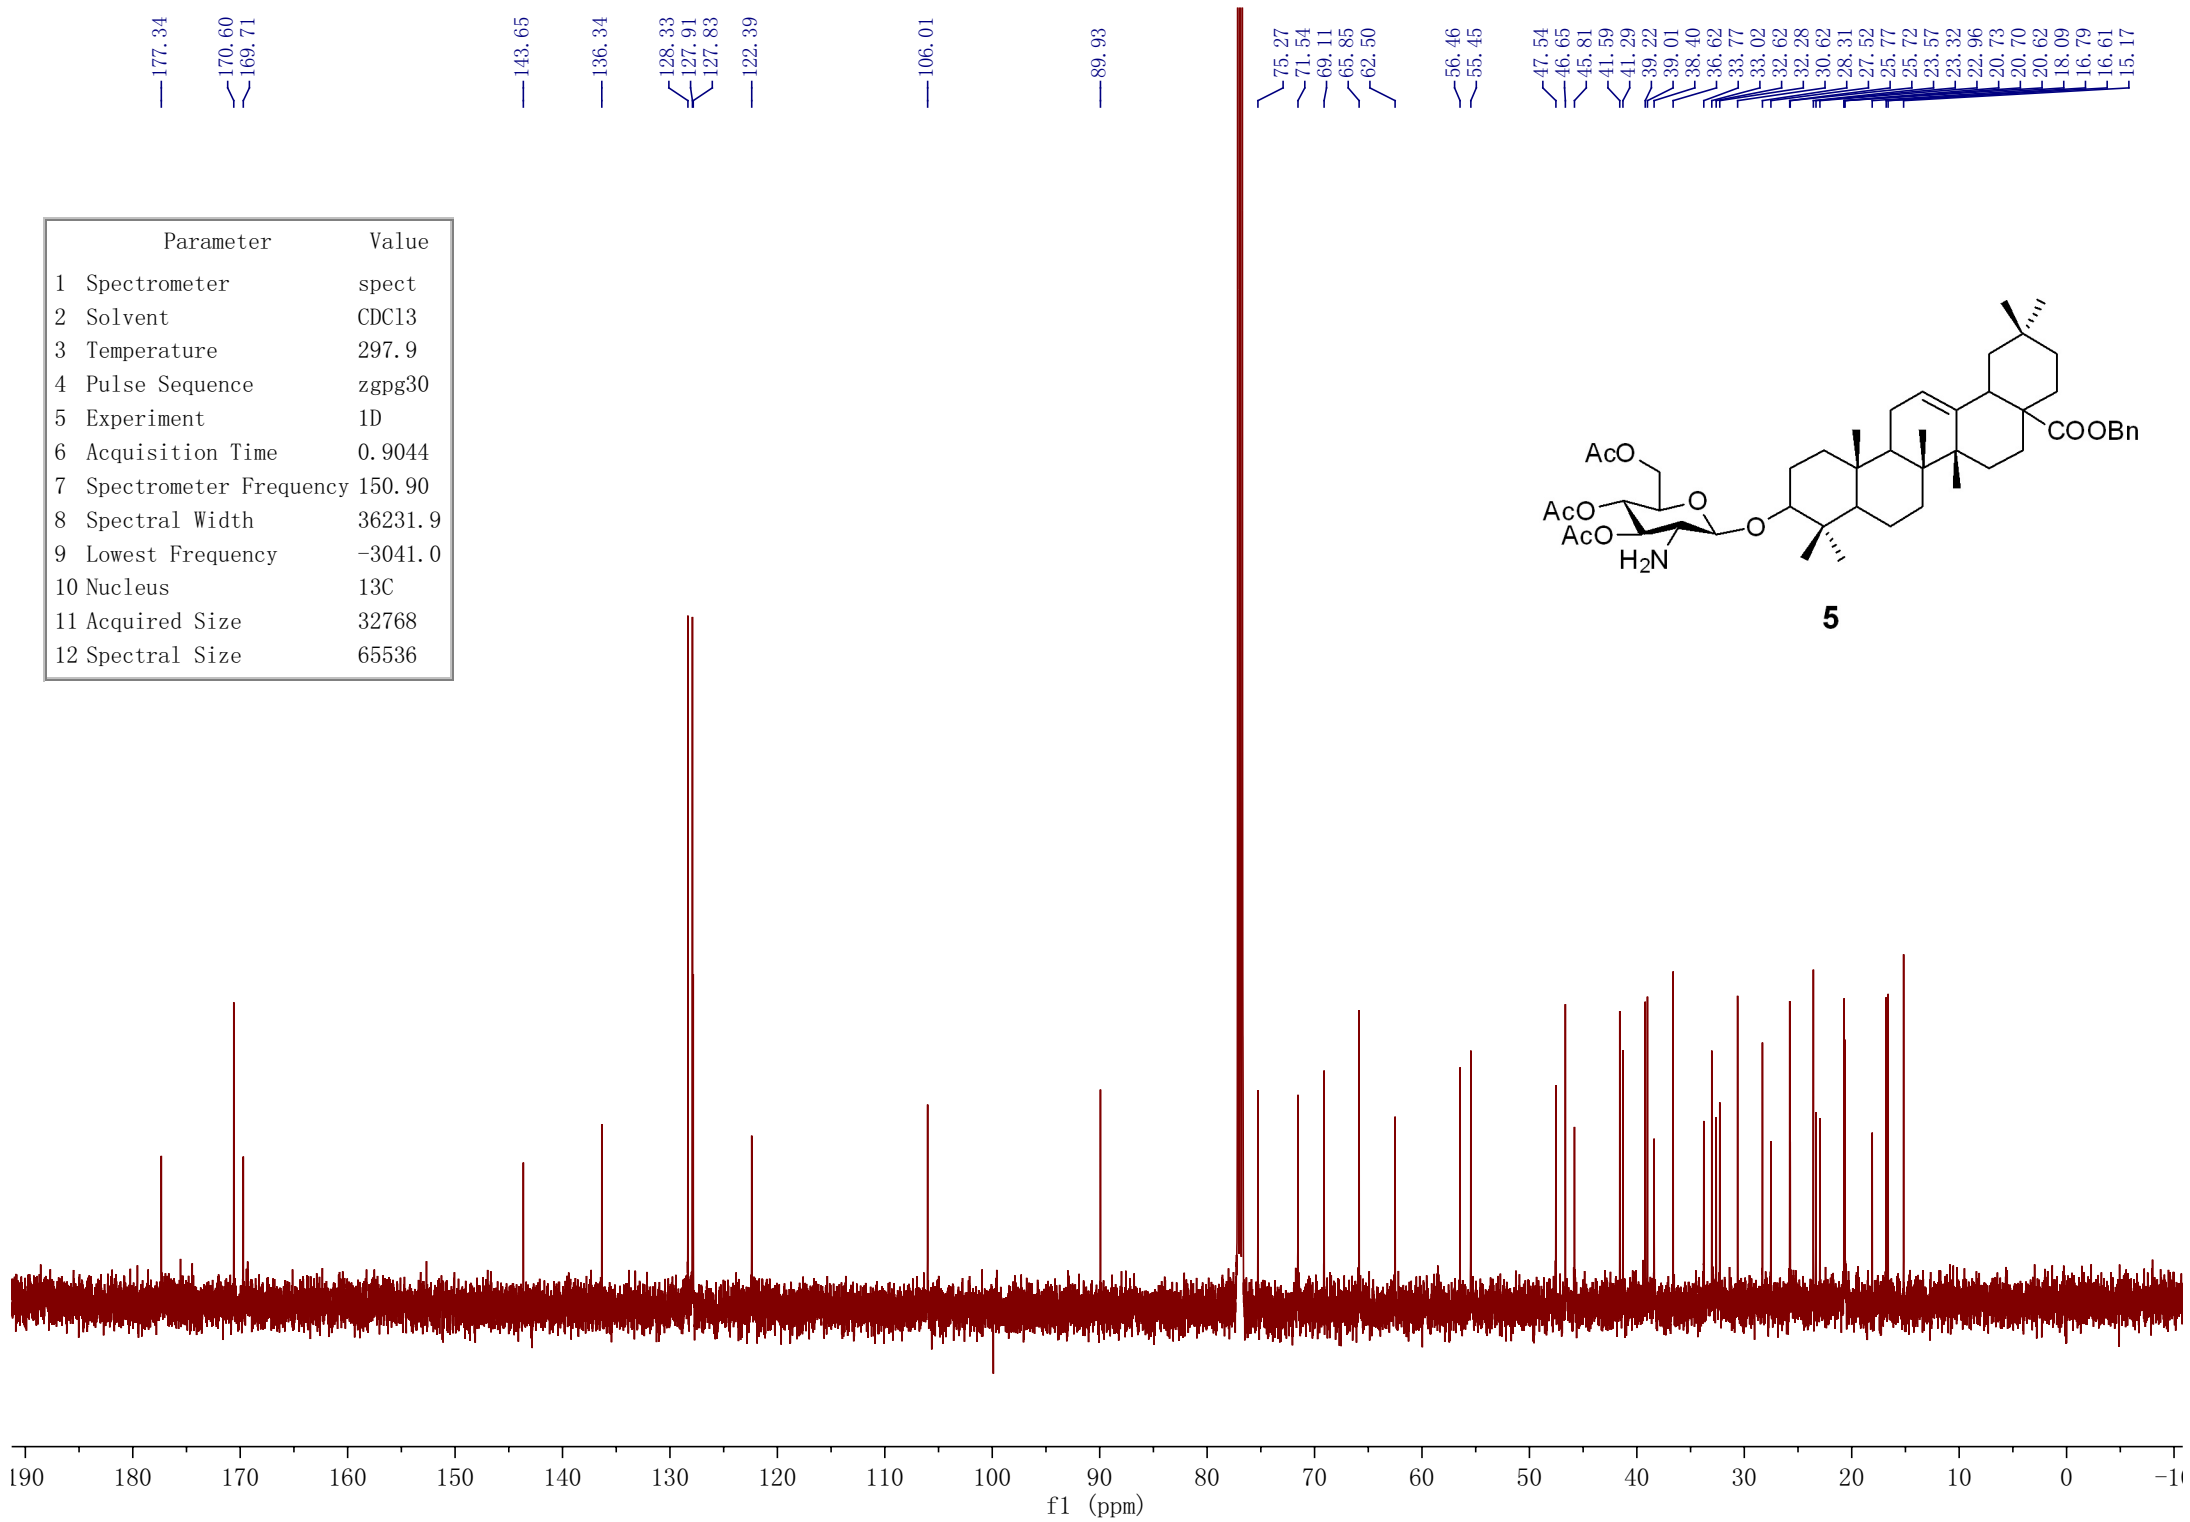

| Parameter                | Value   |
|--------------------------|---------|
| 1 Spectrometer           | spect   |
| 2 Solvent                | CDC13   |
| 3 Temperature            | 297.9   |
| 4 Pulse Sequence         | zg30    |
| 5 Experiment             | 1D      |
| 6 Acquisition Time       | 2.6564  |
| 7 Spectrometer Frequency | 600.13  |
| 8 Spectral Width         | 12335.5 |
| 9 Lowest Frequency       | -2478.8 |
| 10 Nucleus               | 1H      |
| 11 Acquired Size         | 32768   |
| 12 Spectral Size         | 65536   |

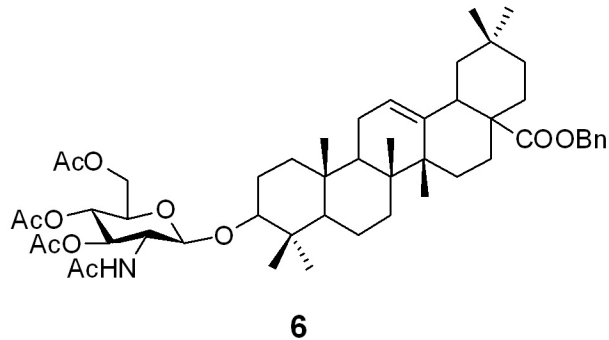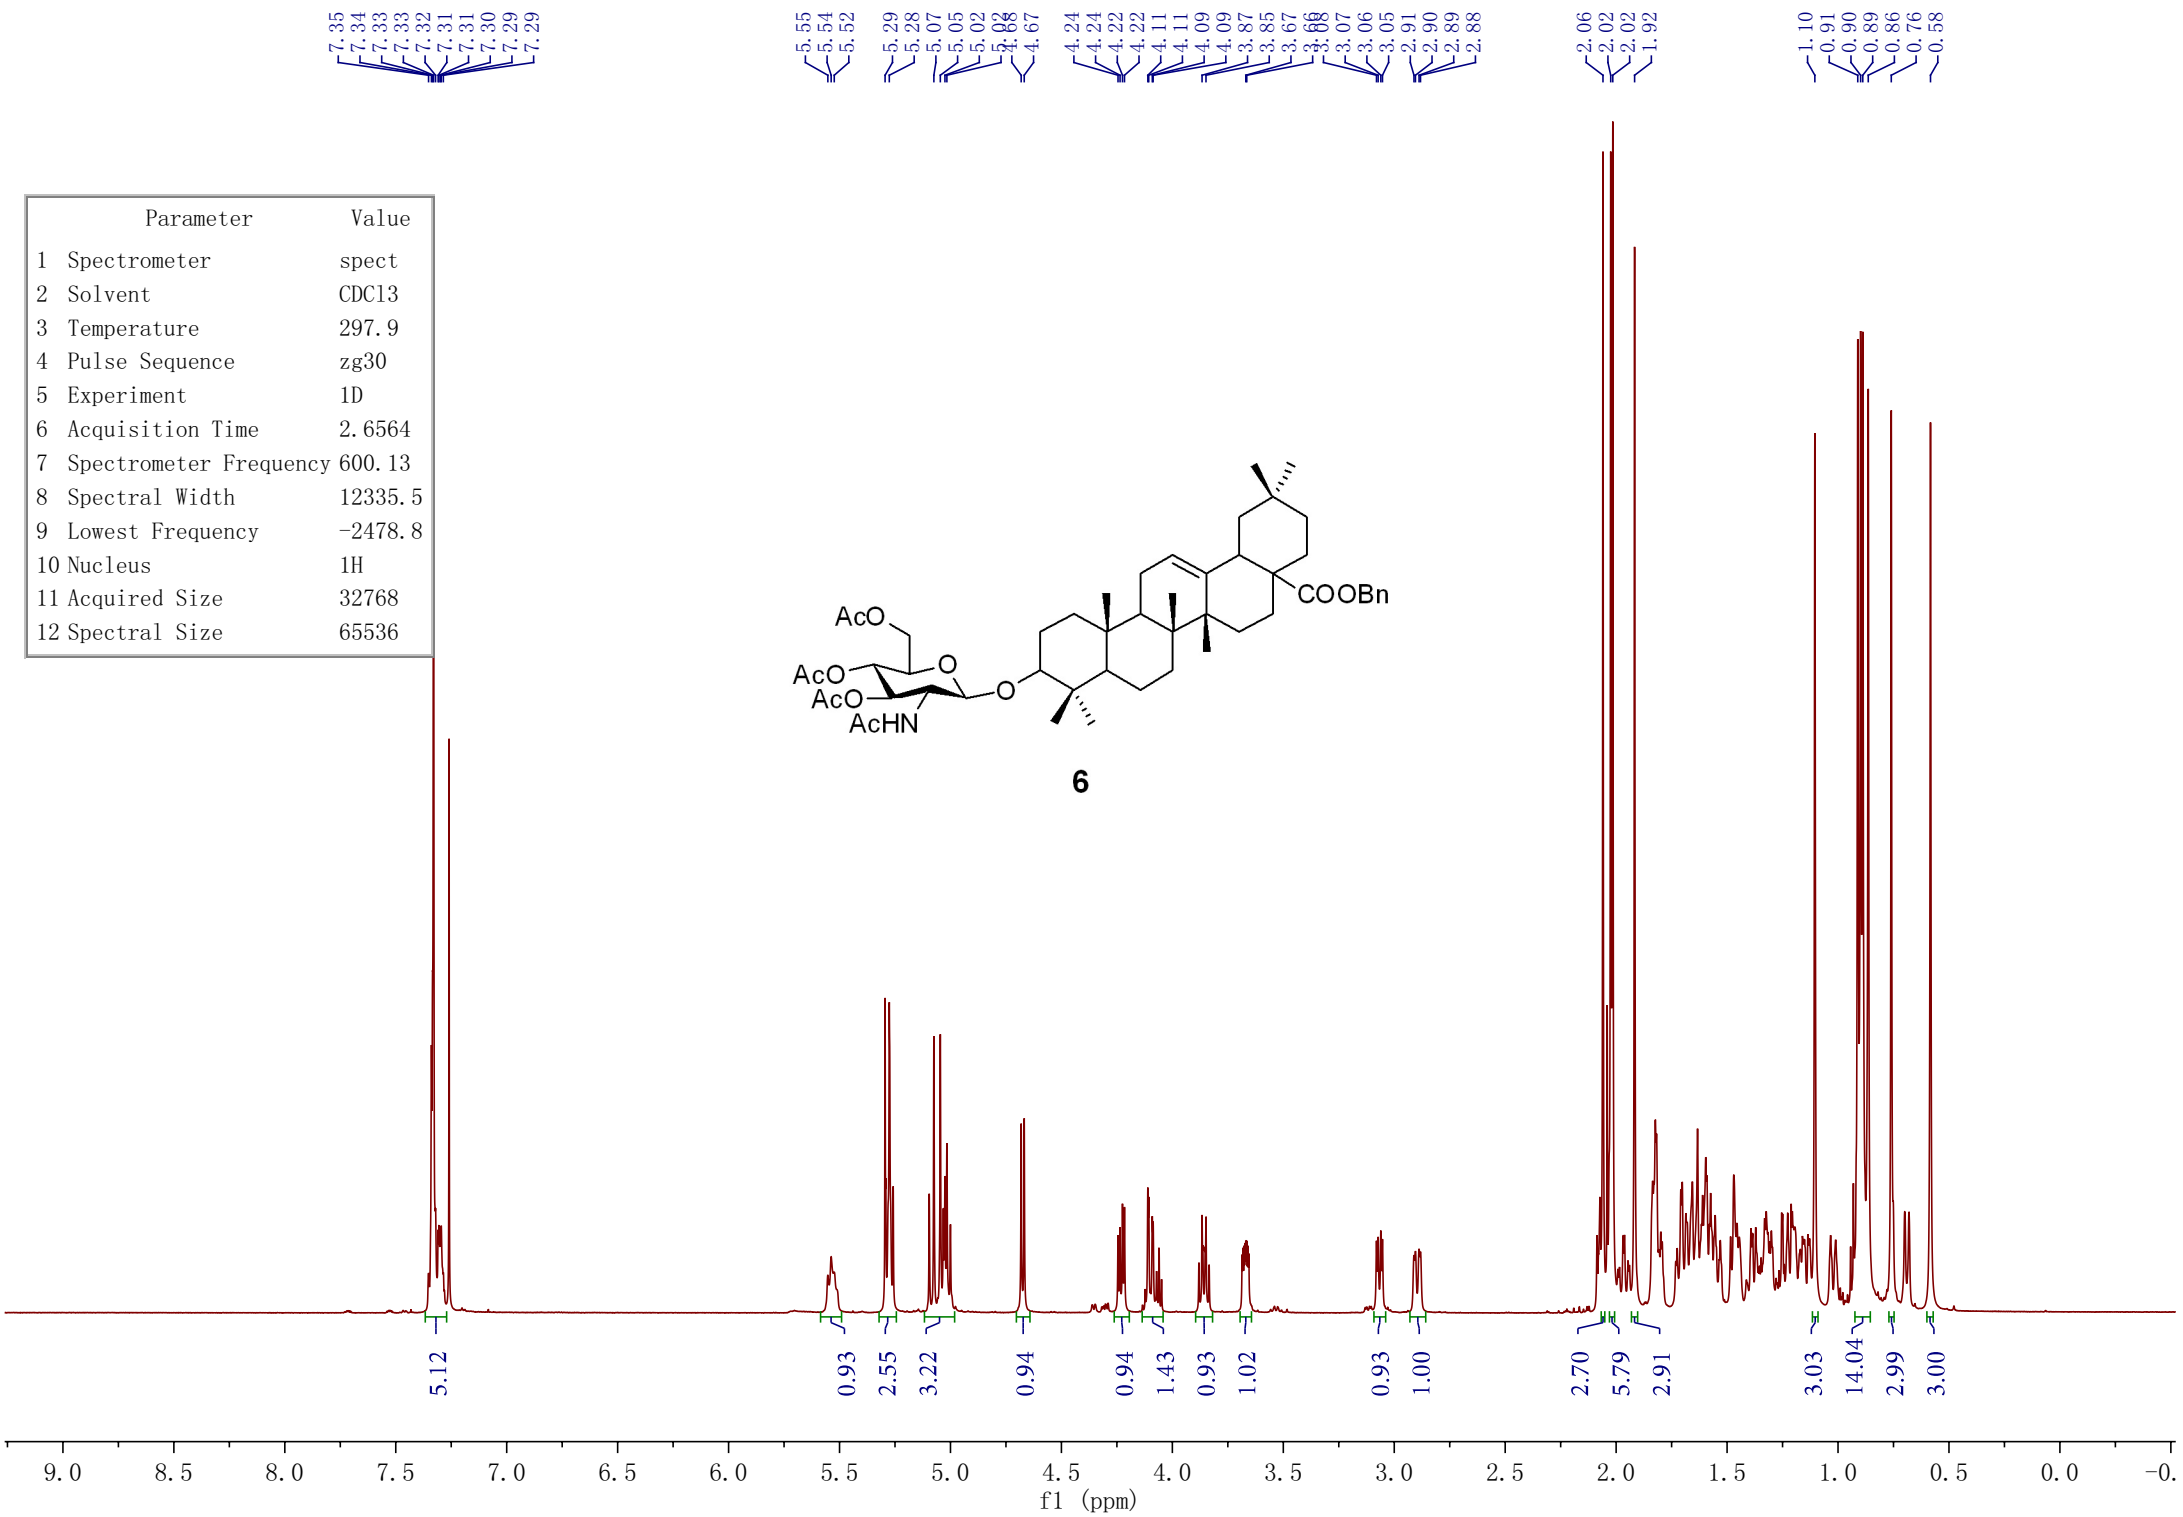

| Parameter                | Value   |
|--------------------------|---------|
| 1 Spectrometer           | spect   |
| 2 Solvent                | CDC13   |
| 3 Temperature            | 297.9   |
| 4 Pulse Sequence         | zgpg30  |
| 5 Experiment             | 1D      |
| 6 Acquisition Time       | 0.9044  |
| 7 Spectrometer Frequency | 150.90  |
| 8 Spectral Width         | 36231.9 |
| 9 Lowest Frequency       | -3041.0 |
| 10 Nucleus               | 13C     |
| 11 Acquired Size         | 32768   |
| 12 Spectral Size         | 65536   |

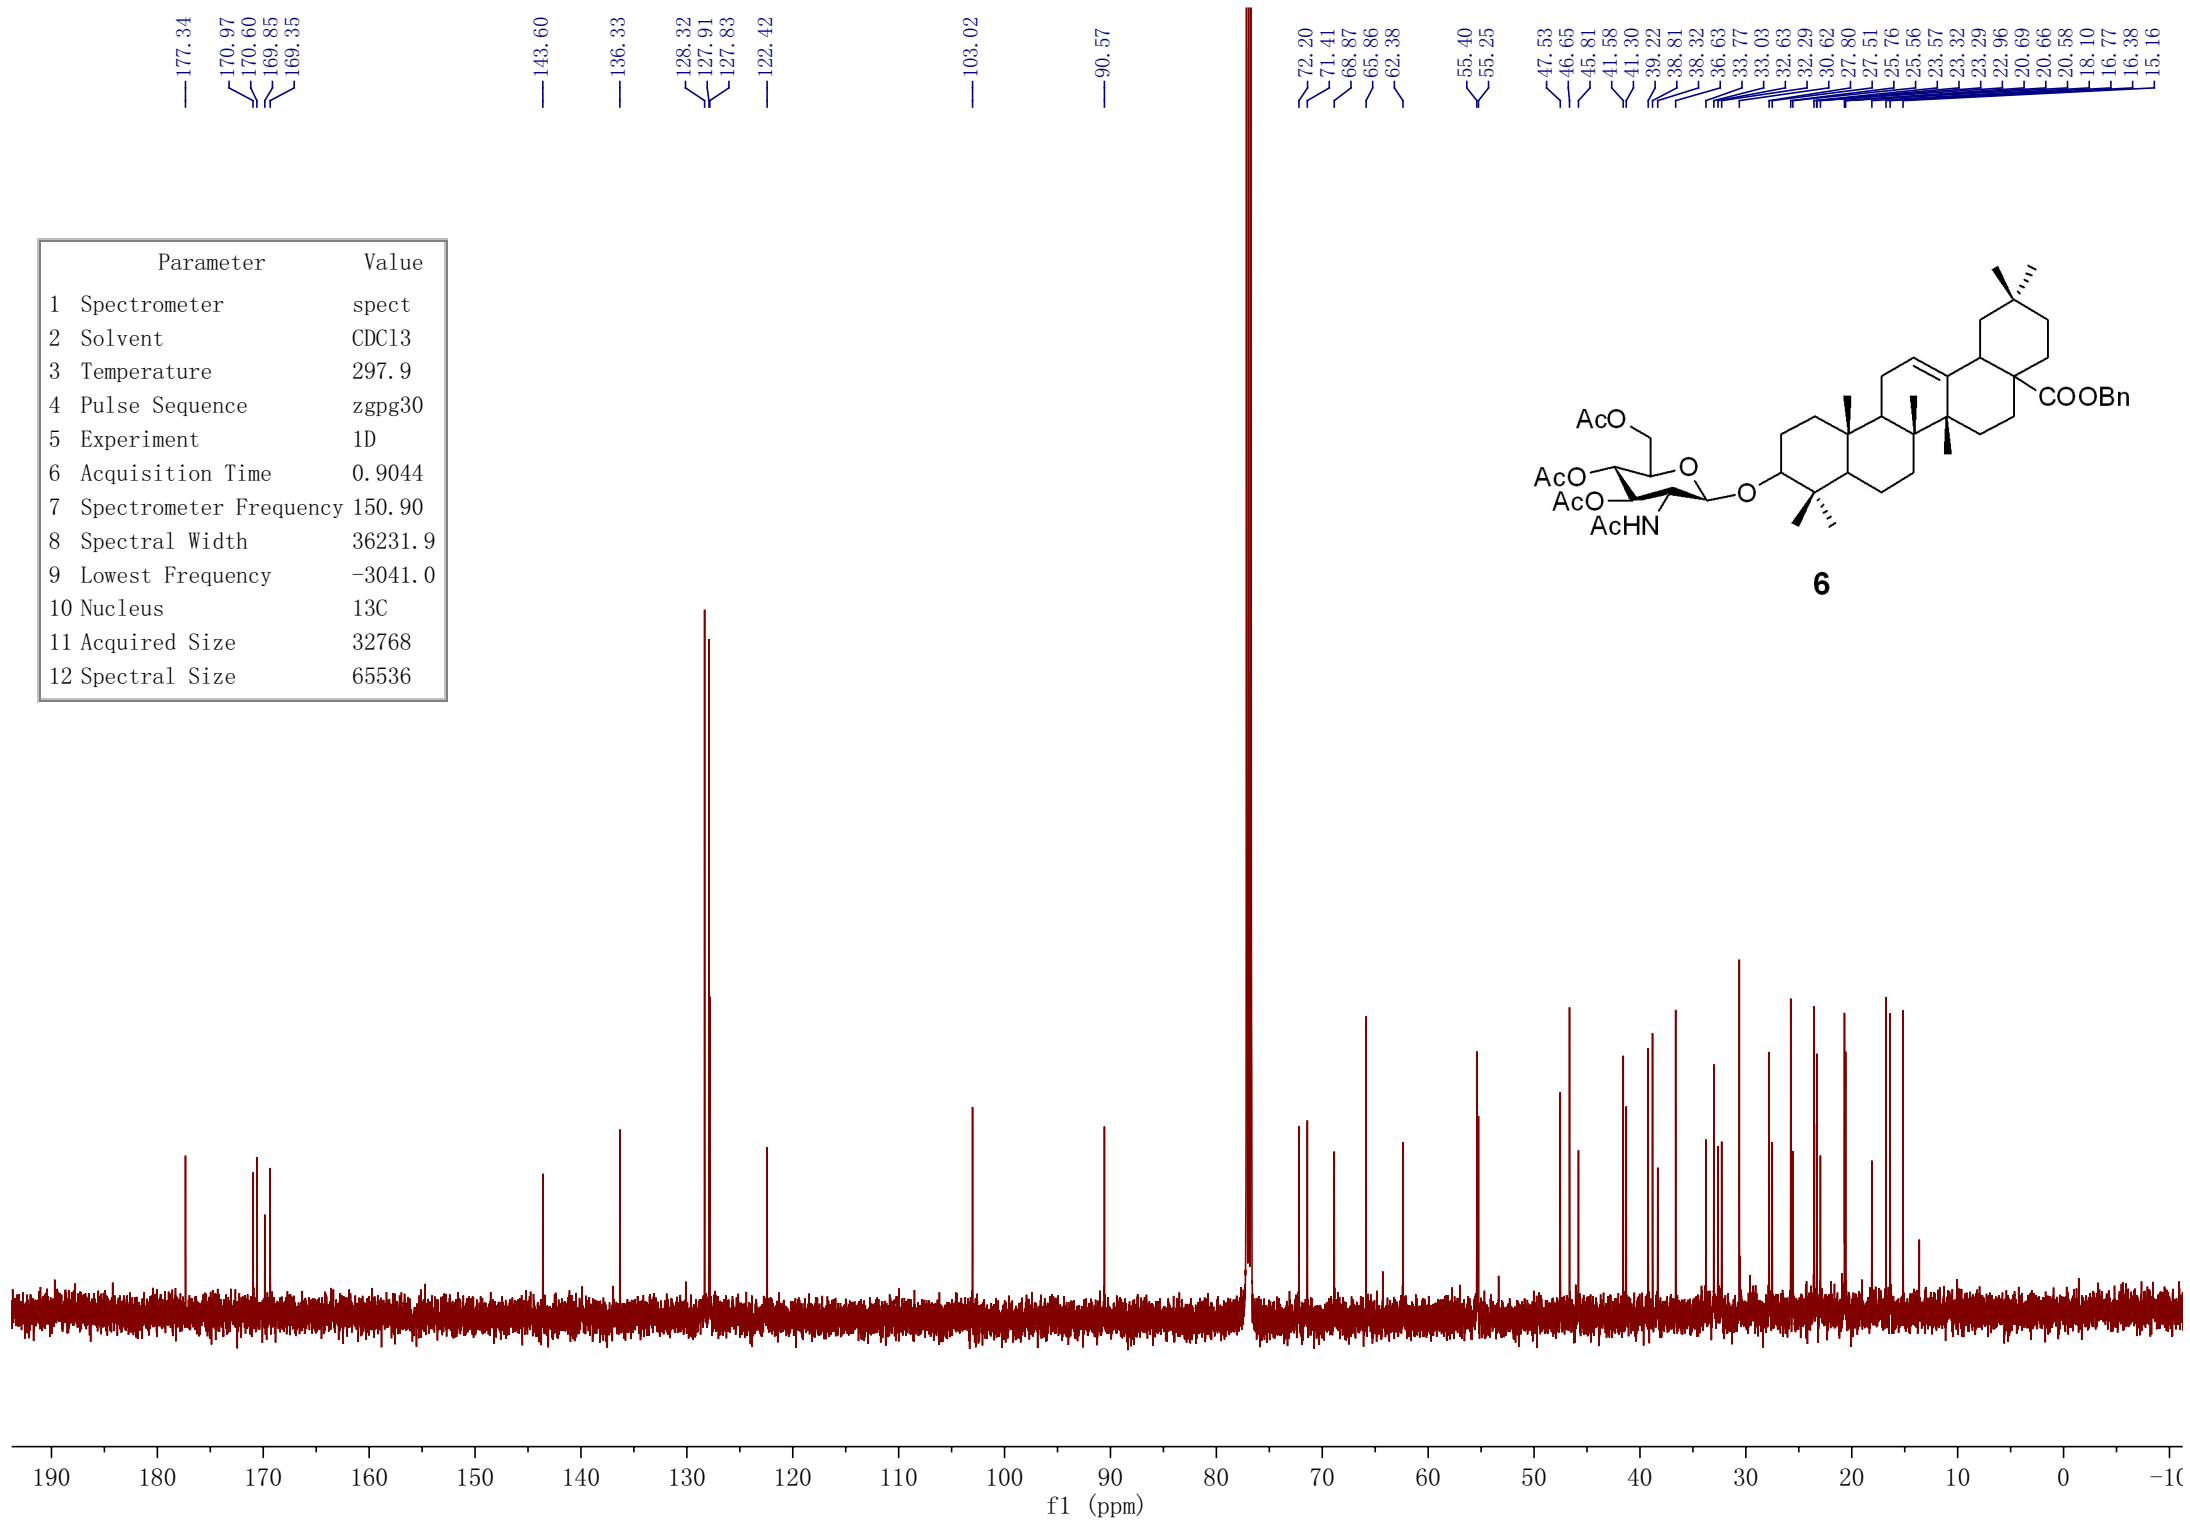

7.34  
7.33  
7.33  
7.32  
7.31  
7.30  
7.29  
7.29  
7.28

5.30  
5.27  
5.12  
5.10  
5.03  
5.01

4.46

3.83  
3.78  
3.72  
3.71  
3.68  
3.60  
3.48  
3.35  
3.05  
2.96  
2.91  
2.88  
2.88

1.98

1.12  
0.92  
0.92  
0.91  
0.91  
0.90  
0.85  
0.75  
0.59

| Parameter                | Value   |
|--------------------------|---------|
| 1 Spectrometer           | spect   |
| 2 Solvent                | CDC13   |
| 3 Temperature            | 297.9   |
| 4 Pulse Sequence         | zg30    |
| 5 Experiment             | 1D      |
| 6 Acquisition Time       | 2.6564  |
| 7 Spectrometer Frequency | 600.13  |
| 8 Spectral Width         | 12335.5 |
| 9 Lowest Frequency       | -2478.8 |
| 10 Nucleus               | 1H      |
| 11 Acquired Size         | 32768   |
| 12 Spectral Size         | 65536   |

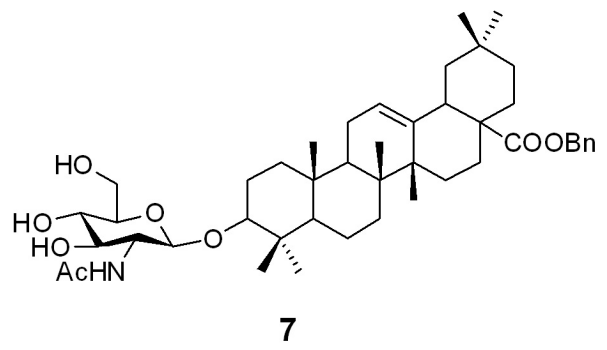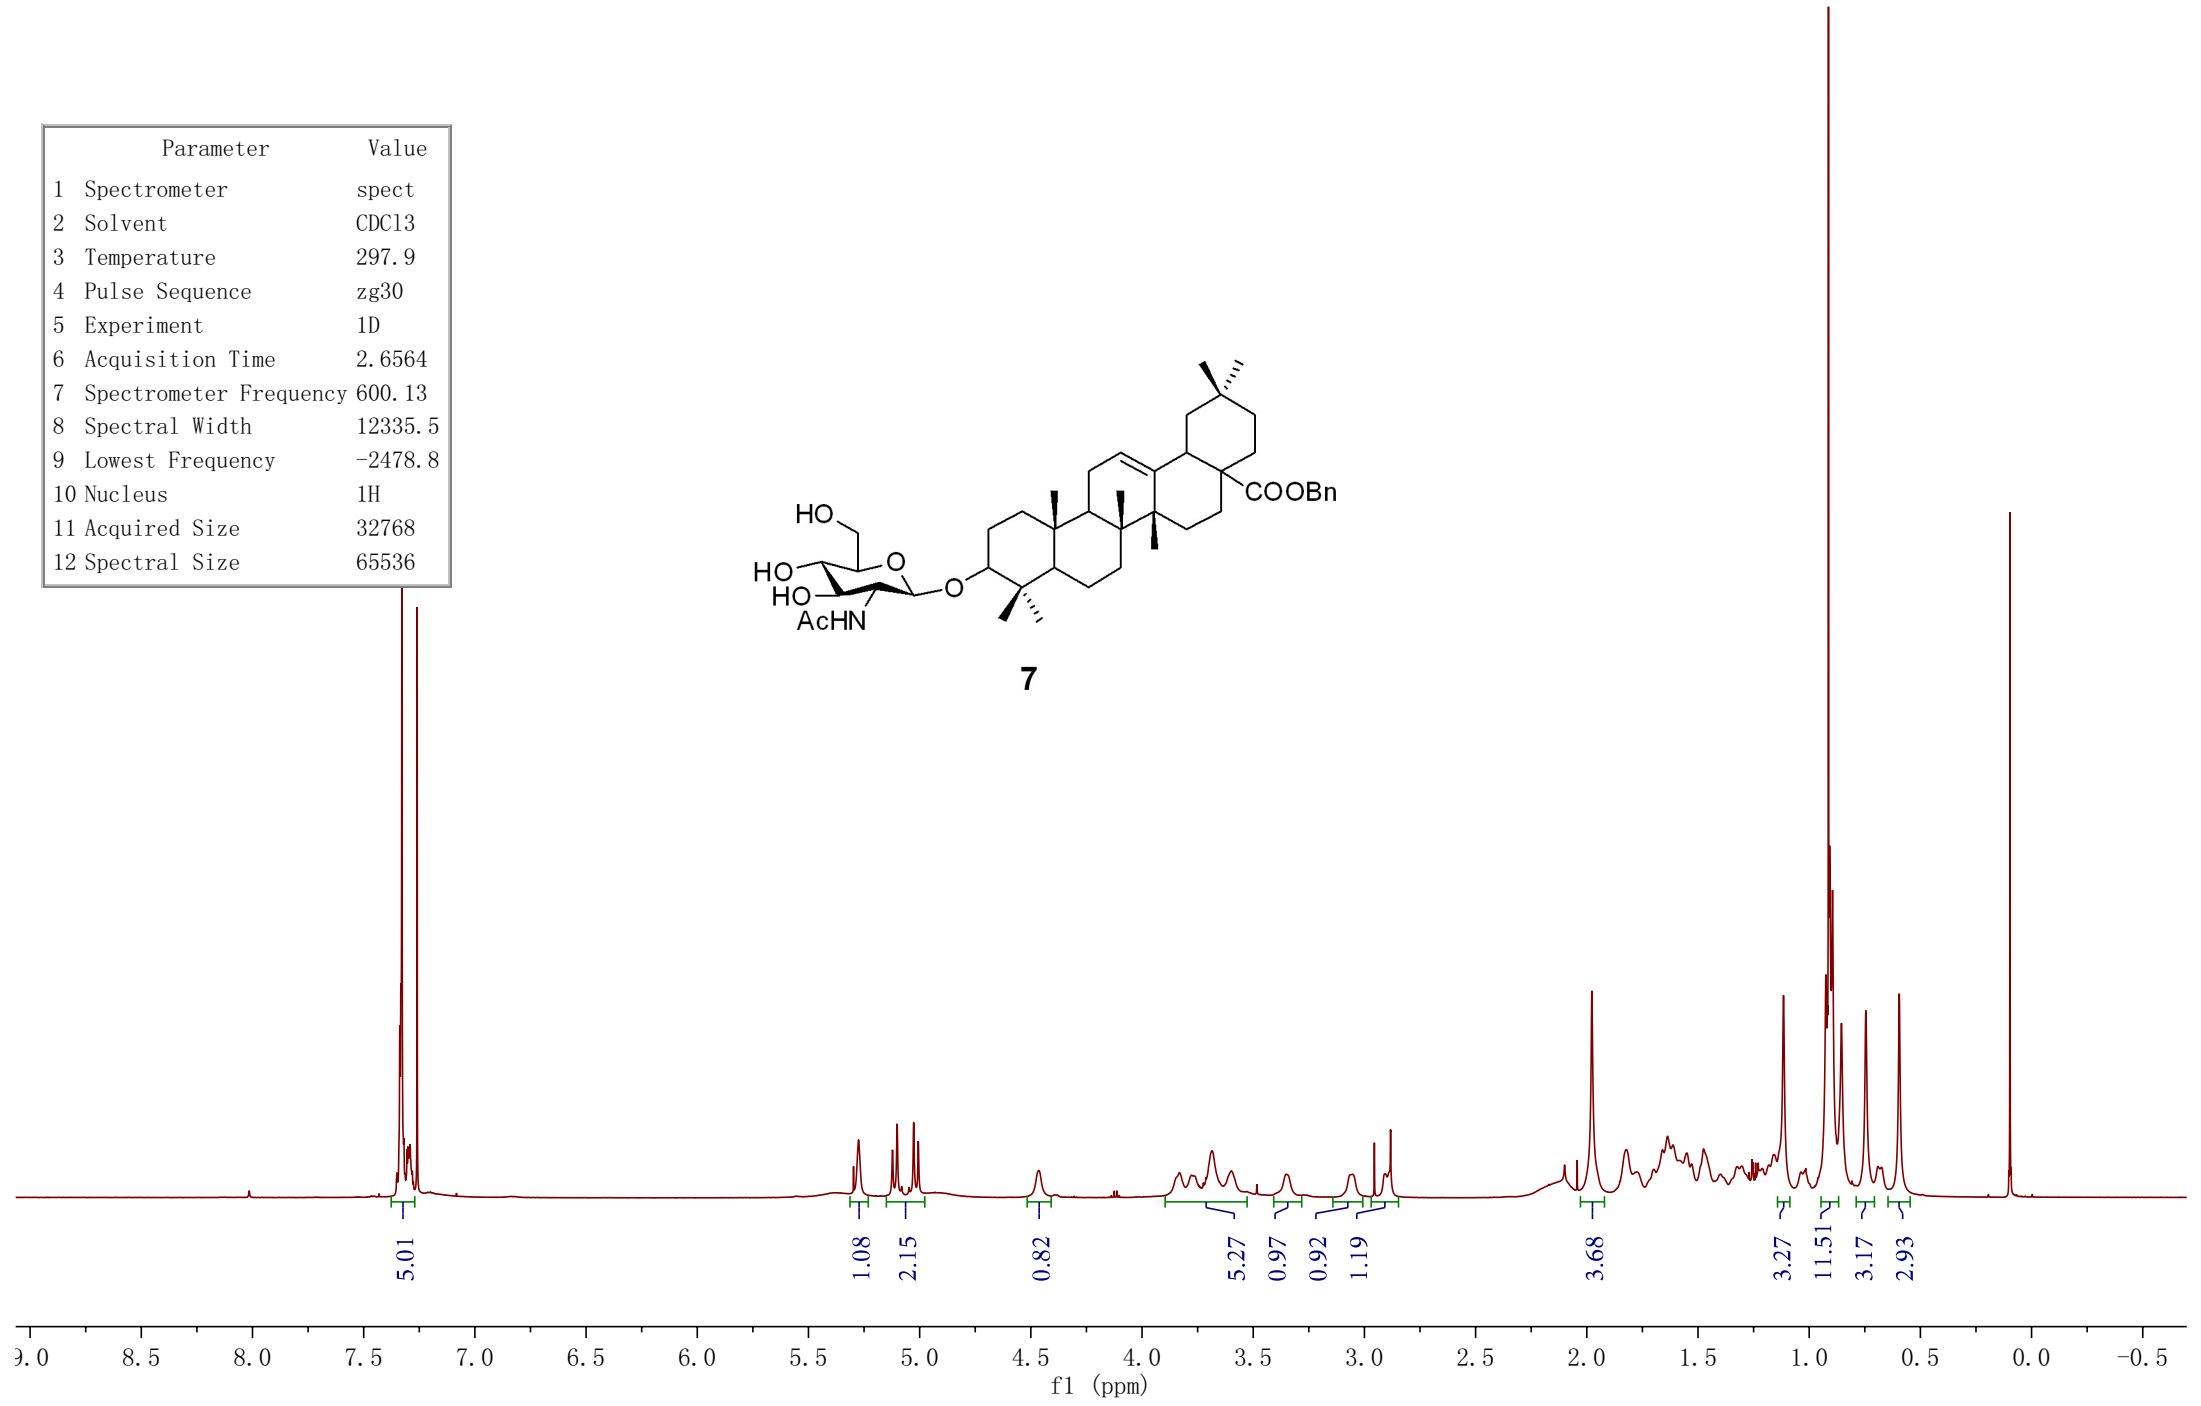

| Parameter                | Value   |
|--------------------------|---------|
| 1 Spectrometer           | spect   |
| 2 Solvent                | CDC13   |
| 3 Temperature            | 297.9   |
| 4 Pulse Sequence         | zgpg30  |
| 5 Experiment             | 1D      |
| 6 Acquisition Time       | 0.9044  |
| 7 Spectrometer Frequency | 150.90  |
| 8 Spectral Width         | 36231.9 |
| 9 Lowest Frequency       | -3007.2 |
| 10 Nucleus               | 13C     |
| 11 Acquired Size         | 32768   |
| 12 Spectral Size         | 65536   |

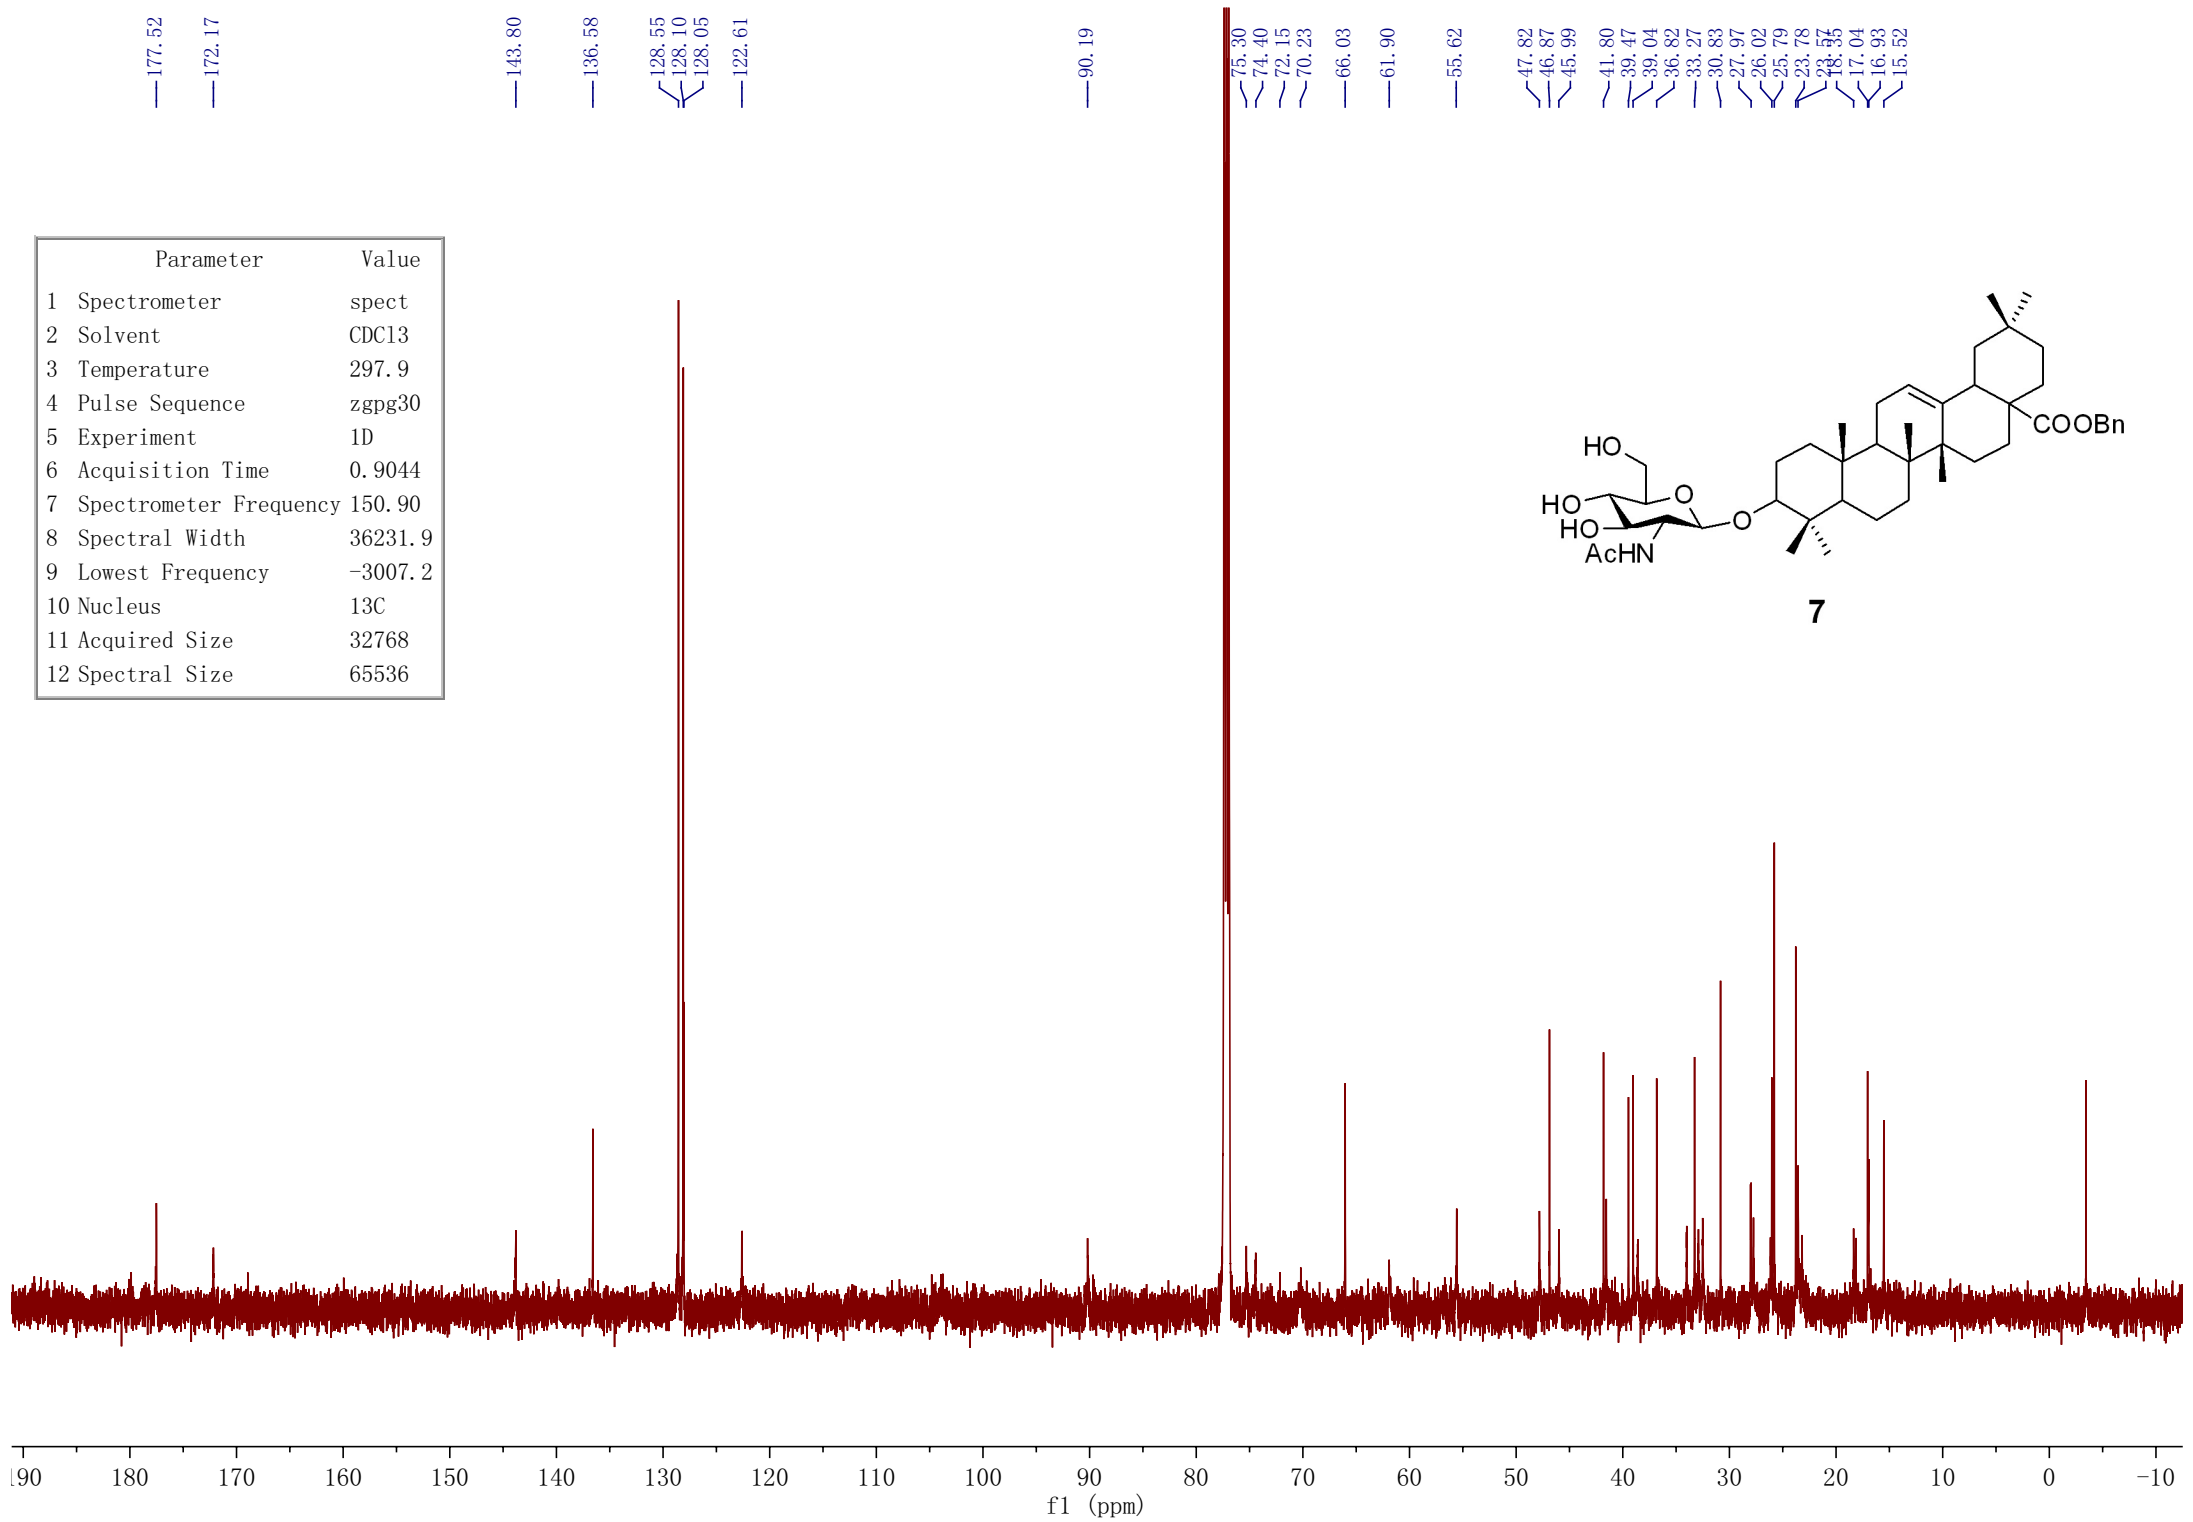



| Parameter                | Value   |
|--------------------------|---------|
| 1 Spectrometer           | spect   |
| 2 Solvent                | CDC13   |
| 3 Temperature            | 297.9   |
| 4 Pulse Sequence         | zg30    |
| 5 Experiment             | 1D      |
| 6 Acquisition Time       | 2.6564  |
| 7 Spectrometer Frequency | 600.13  |
| 8 Spectral Width         | 12335.5 |
| 9 Lowest Frequency       | -2478.8 |
| 10 Nucleus               | 1H      |
| 11 Acquired Size         | 32768   |
| 12 Spectral Size         | 65536   |

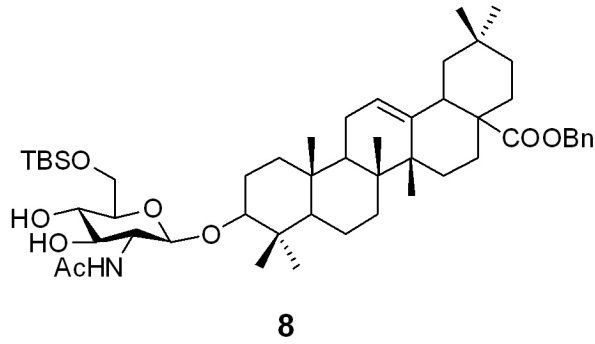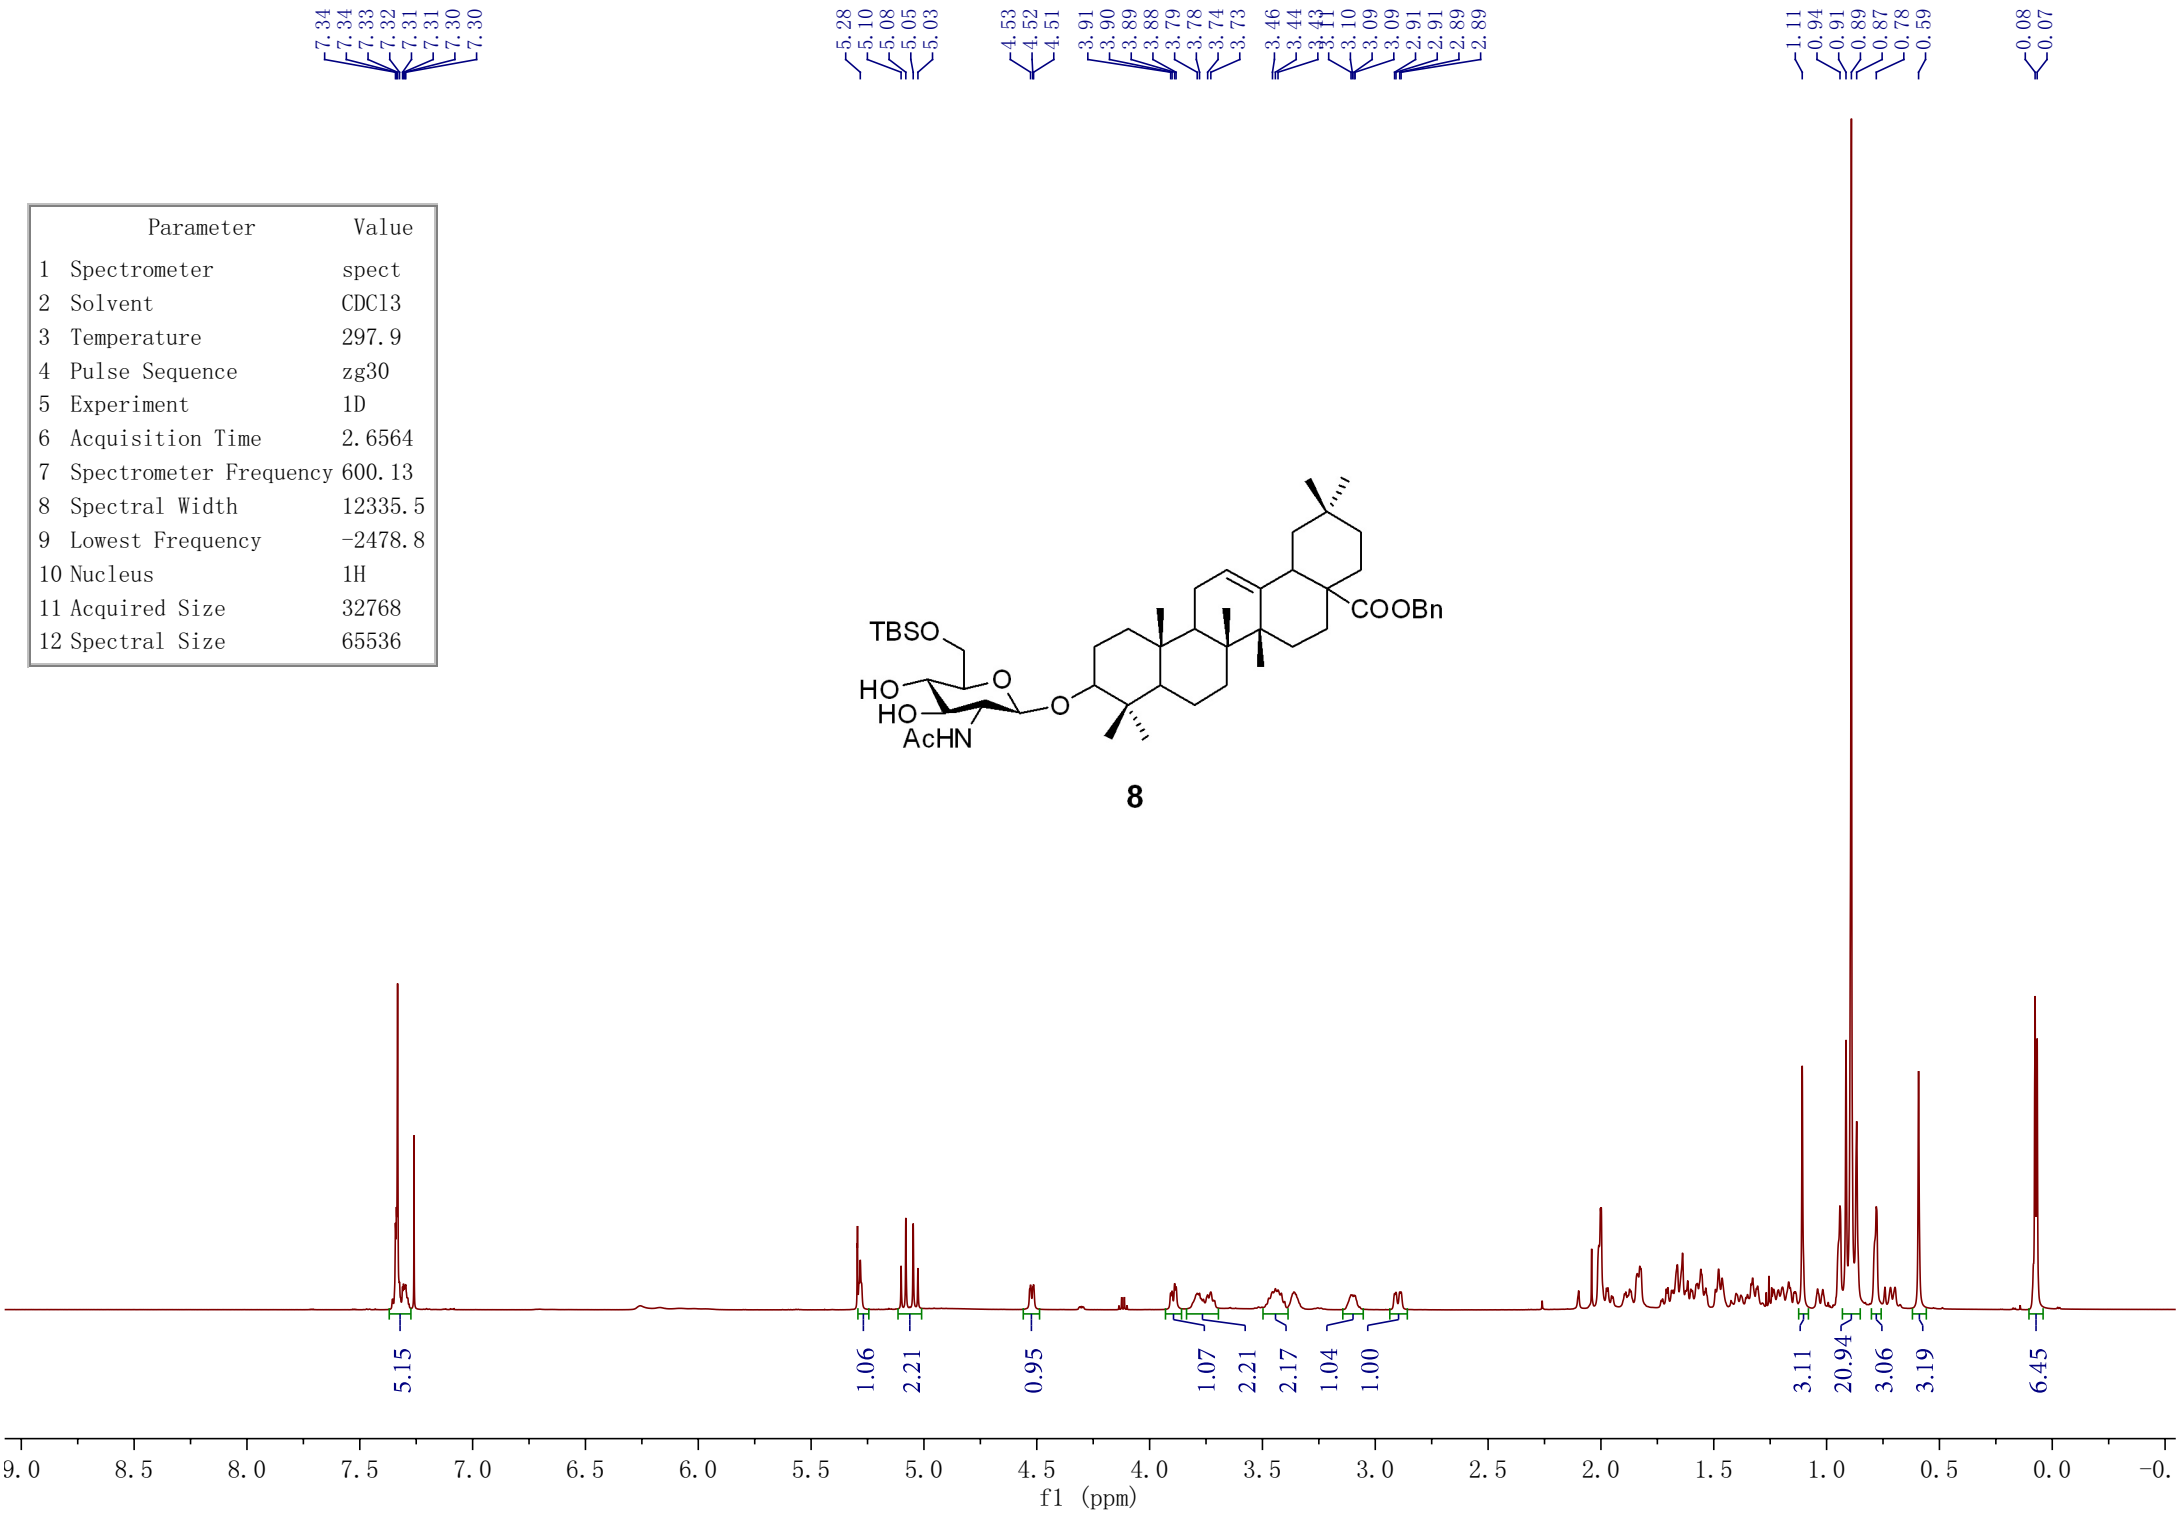

| Parameter                | Value           |
|--------------------------|-----------------|
| 1 Spectrometer           | spect           |
| 2 Solvent                | CDC13           |
| 3 Temperature            | 297.9           |
| 4 Pulse Sequence         | zgpg30          |
| 5 Experiment             | 1D              |
| 6 Acquisition Time       | 0.9044          |
| 7 Spectrometer Frequency | 150.90          |
| 8 Spectral Width         | 36231.9         |
| 9 Lowest Frequency       | -3041.0         |
| 10 Nucleus               | <sup>13</sup> C |
| 11 Acquired Size         | 32768           |
| 12 Spectral Size         | 65536           |

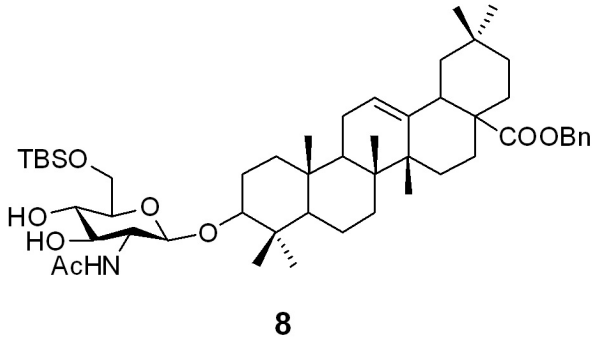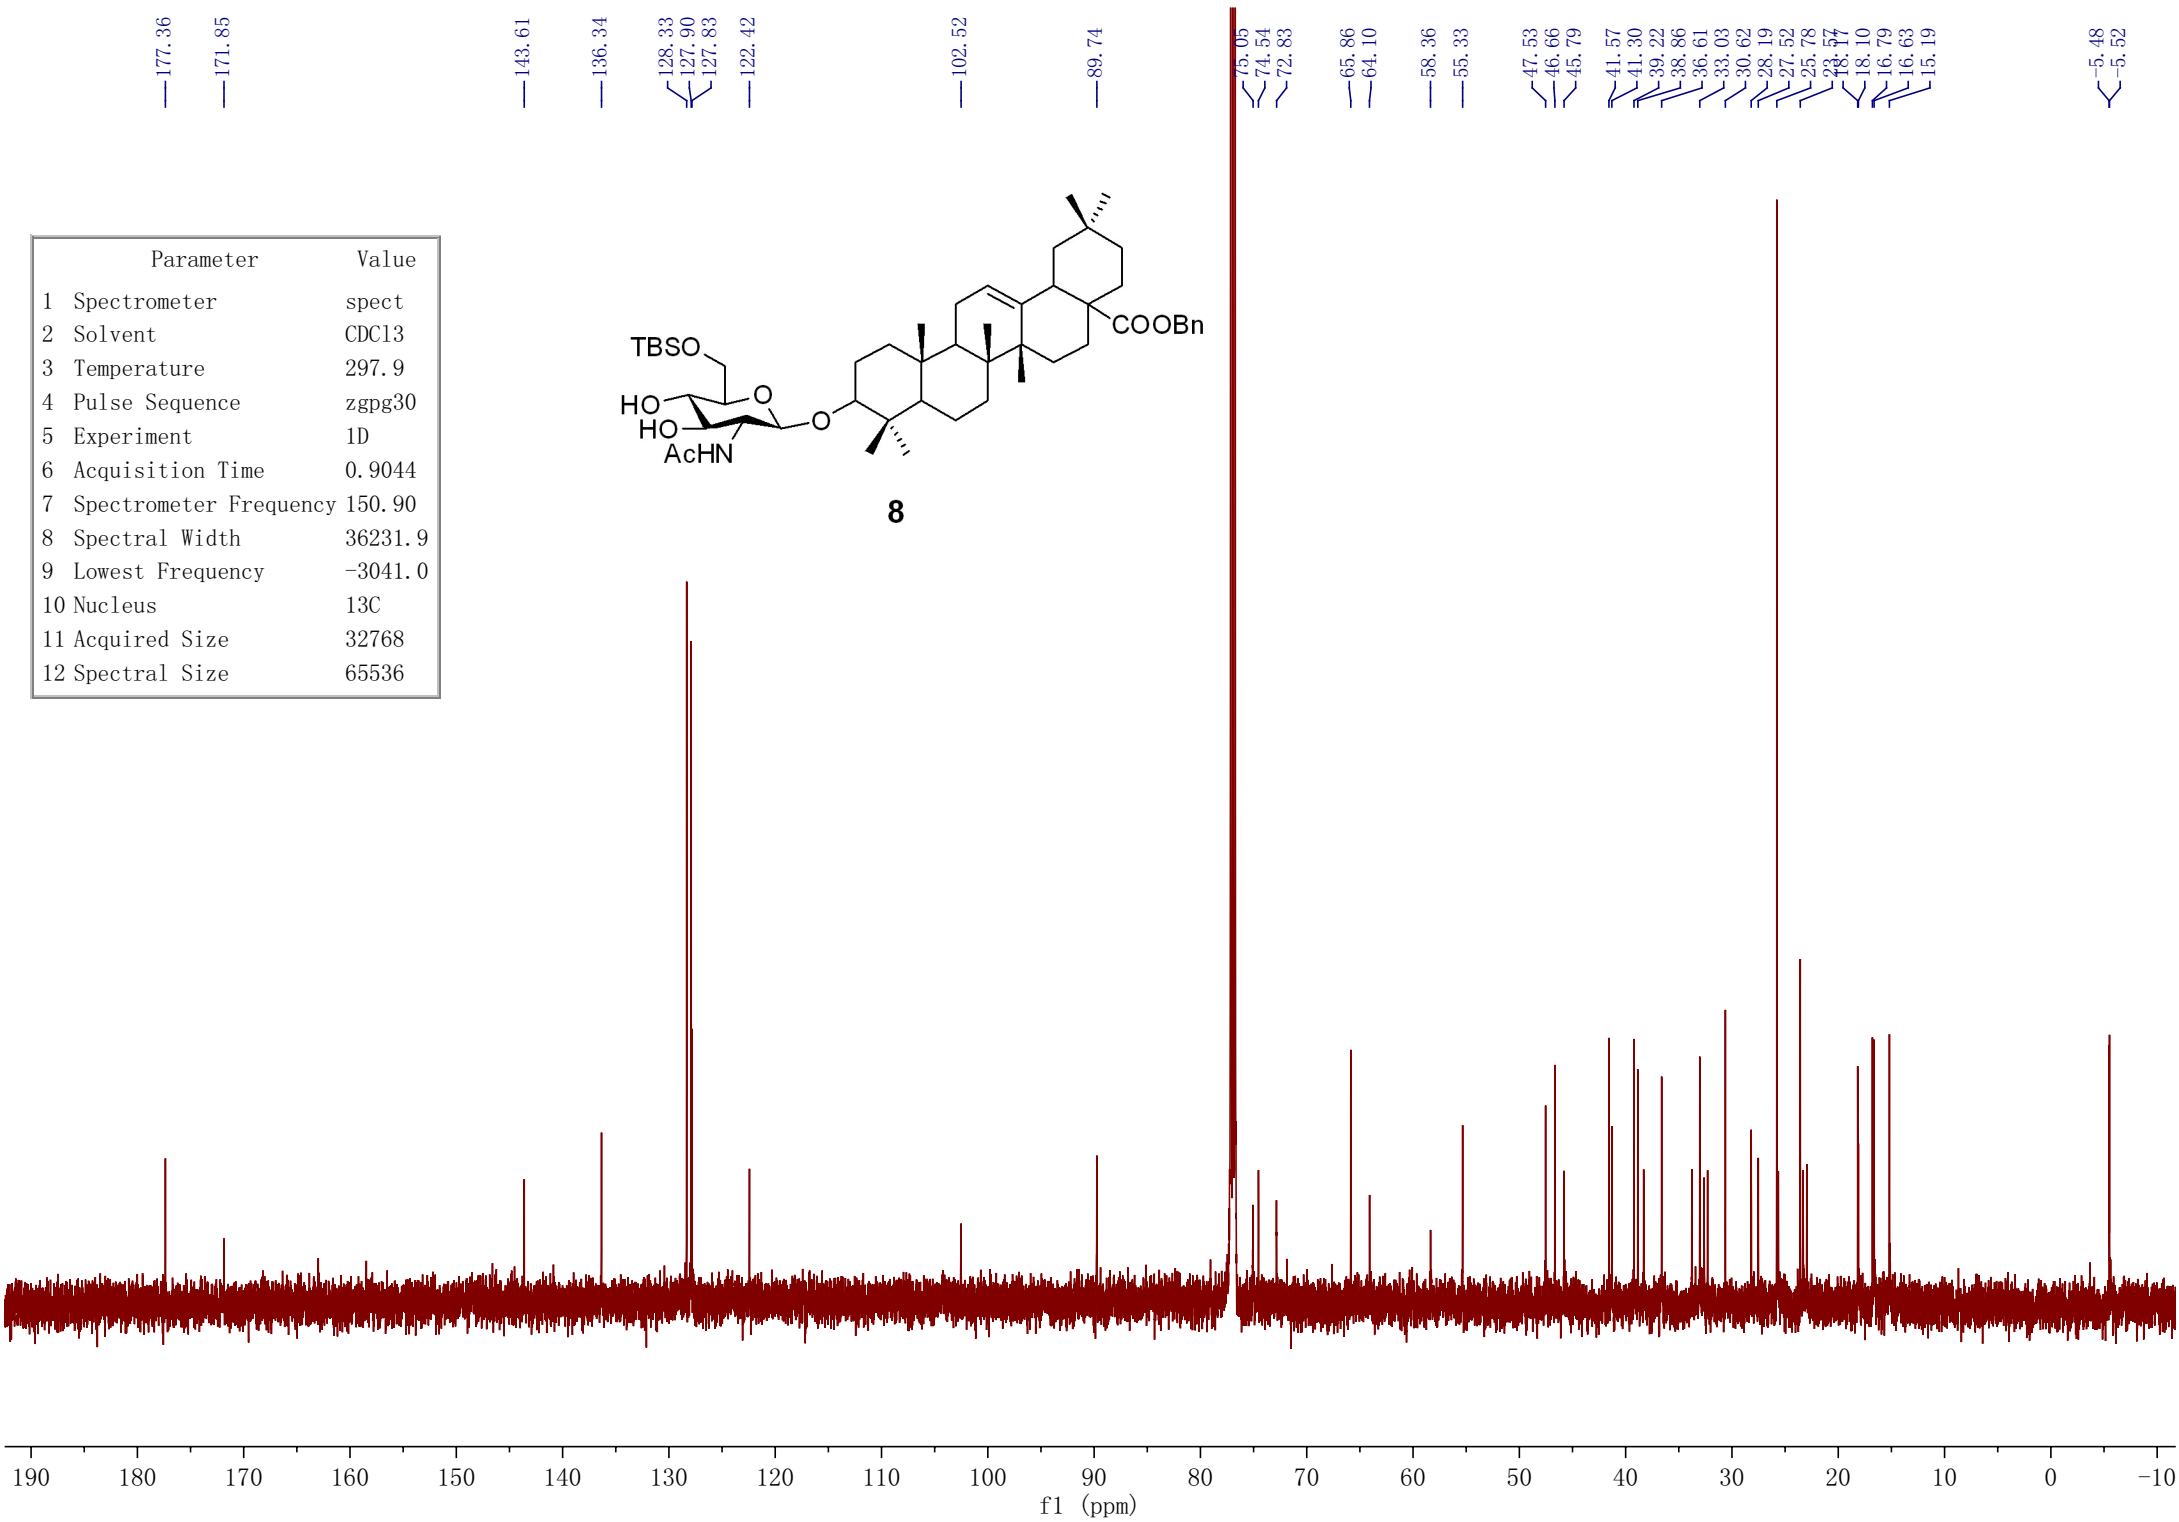

| Parameter                | Value   |
|--------------------------|---------|
| 1 Spectrometer           | spect   |
| 2 Solvent                | CDC13   |
| 3 Temperature            | 297.9   |
| 4 Pulse Sequence         | zg30    |
| 5 Experiment             | 1D      |
| 6 Acquisition Time       | 2.6564  |
| 7 Spectrometer Frequency | 600.13  |
| 8 Spectral Width         | 12335.5 |
| 9 Lowest Frequency       | -2478.8 |
| 10 Nucleus               | 1H      |
| 11 Acquired Size         | 32768   |
| 12 Spectral Size         | 65536   |

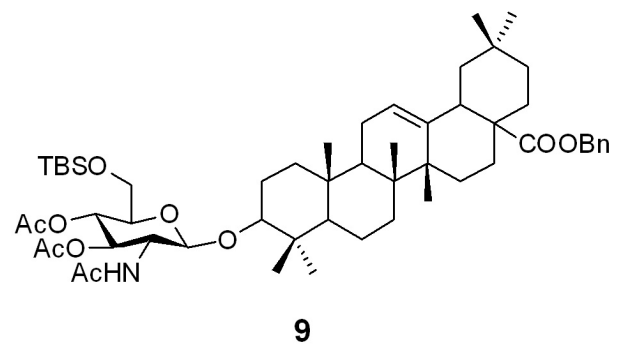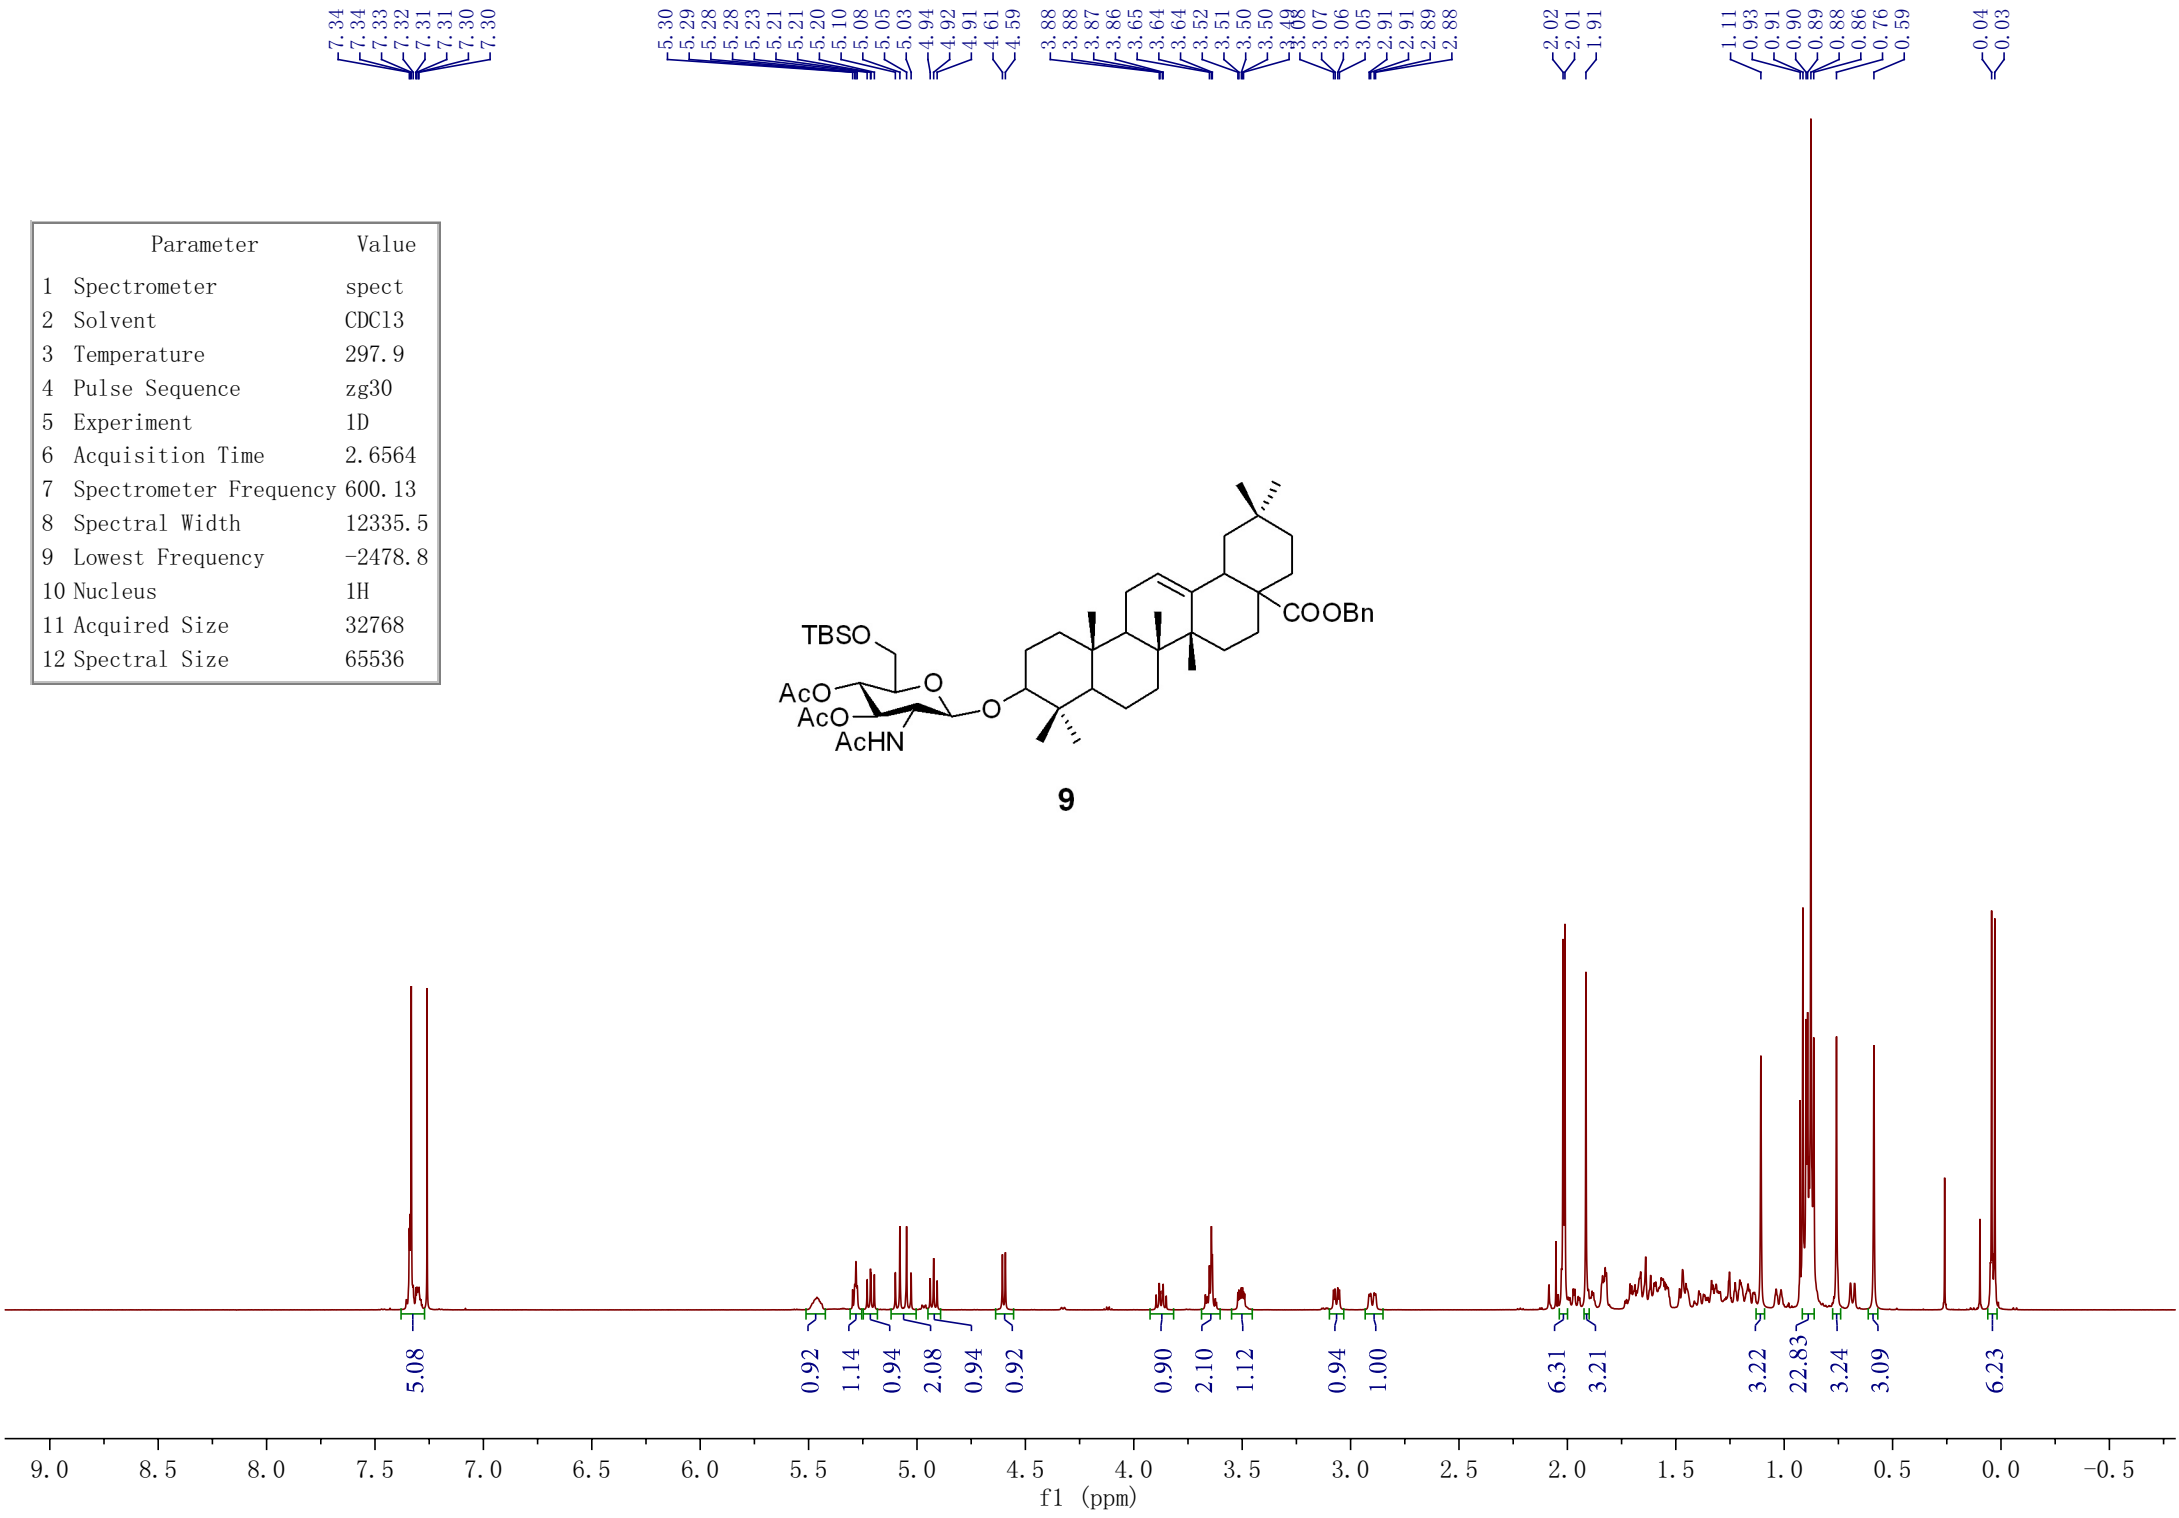

| Parameter                | Value   |
|--------------------------|---------|
| 1 Spectrometer           | spect   |
| 2 Solvent                | CDC13   |
| 3 Temperature            | 297.9   |
| 4 Pulse Sequence         | zgpg30  |
| 5 Experiment             | 1D      |
| 6 Acquisition Time       | 0.9044  |
| 7 Spectrometer Frequency | 150.90  |
| 8 Spectral Width         | 36231.9 |
| 9 Lowest Frequency       | -3041.0 |
| 10 Nucleus               | 13C     |
| 11 Acquired Size         | 32768   |
| 12 Spectral Size         | 65536   |

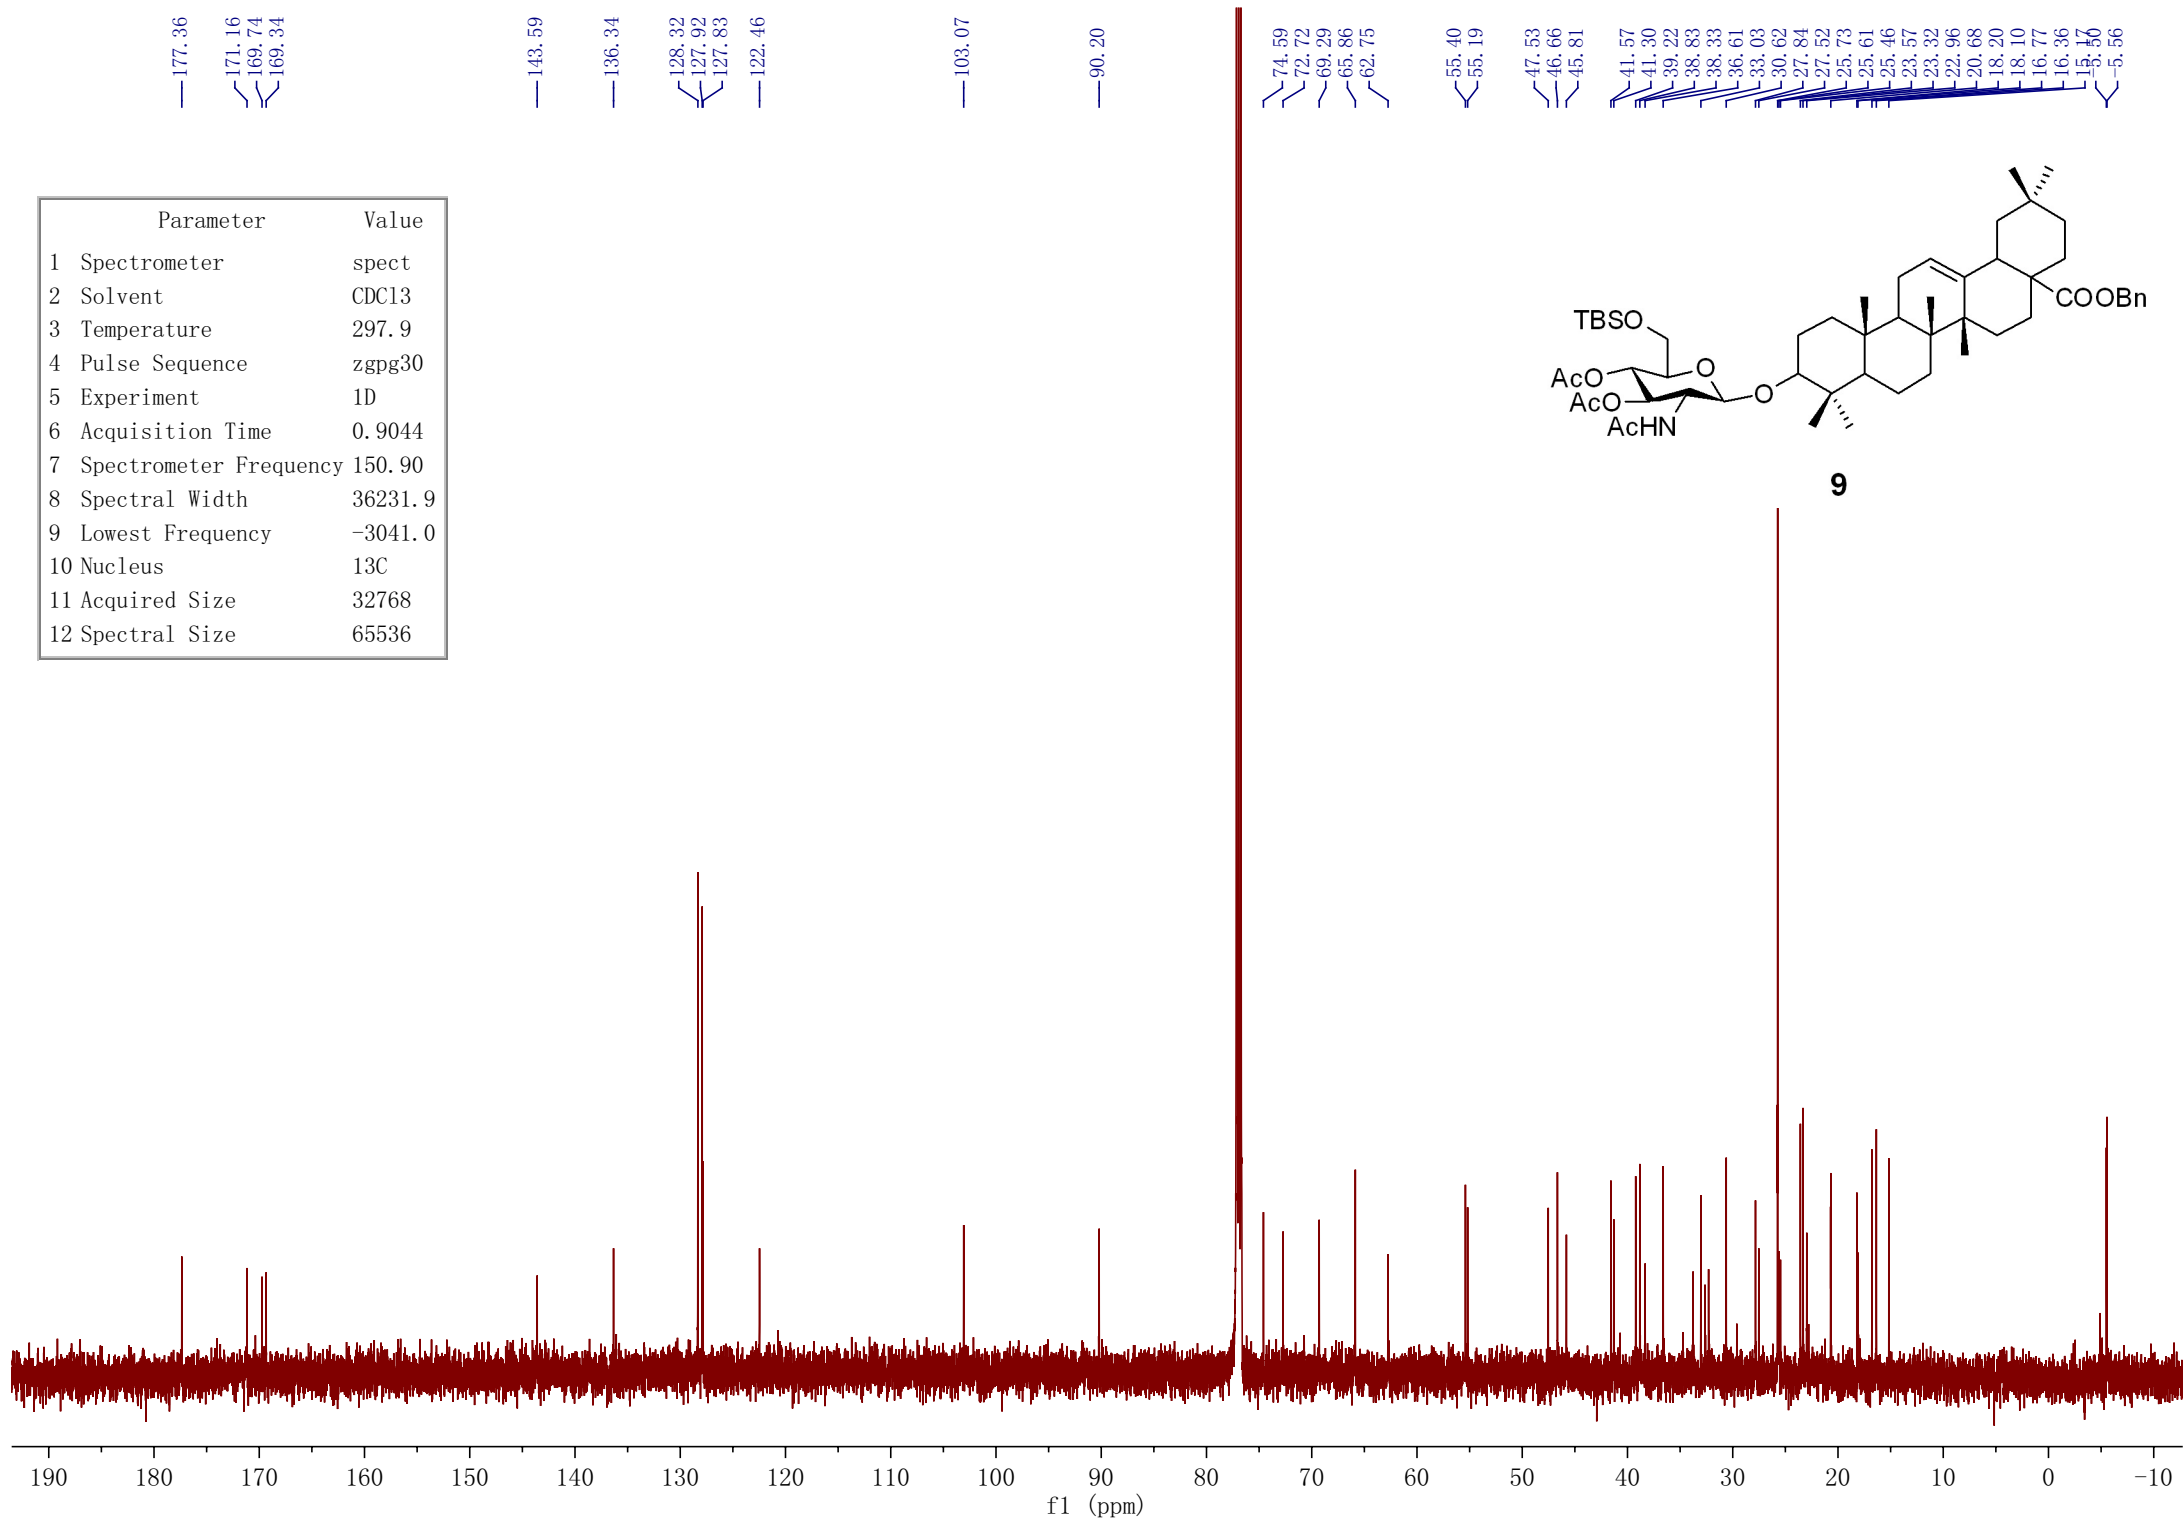

| Parameter                | Value   |
|--------------------------|---------|
| 1 Spectrometer           | spect   |
| 2 Solvent                | CDC13   |
| 3 Temperature            | 297.9   |
| 4 Pulse Sequence         | zg30    |
| 5 Experiment             | 1D      |
| 6 Acquisition Time       | 2.6564  |
| 7 Spectrometer Frequency | 600.13  |
| 8 Spectral Width         | 12335.5 |
| 9 Lowest Frequency       | -2478.8 |
| 10 Nucleus               | 1H      |
| 11 Acquired Size         | 32768   |
| 12 Spectral Size         | 65536   |

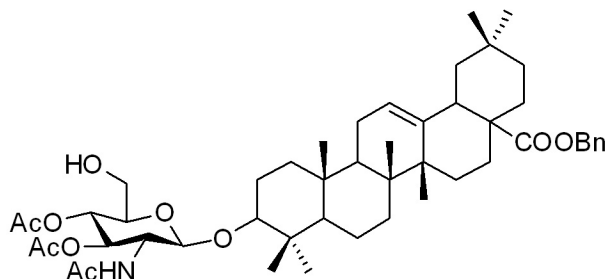

10

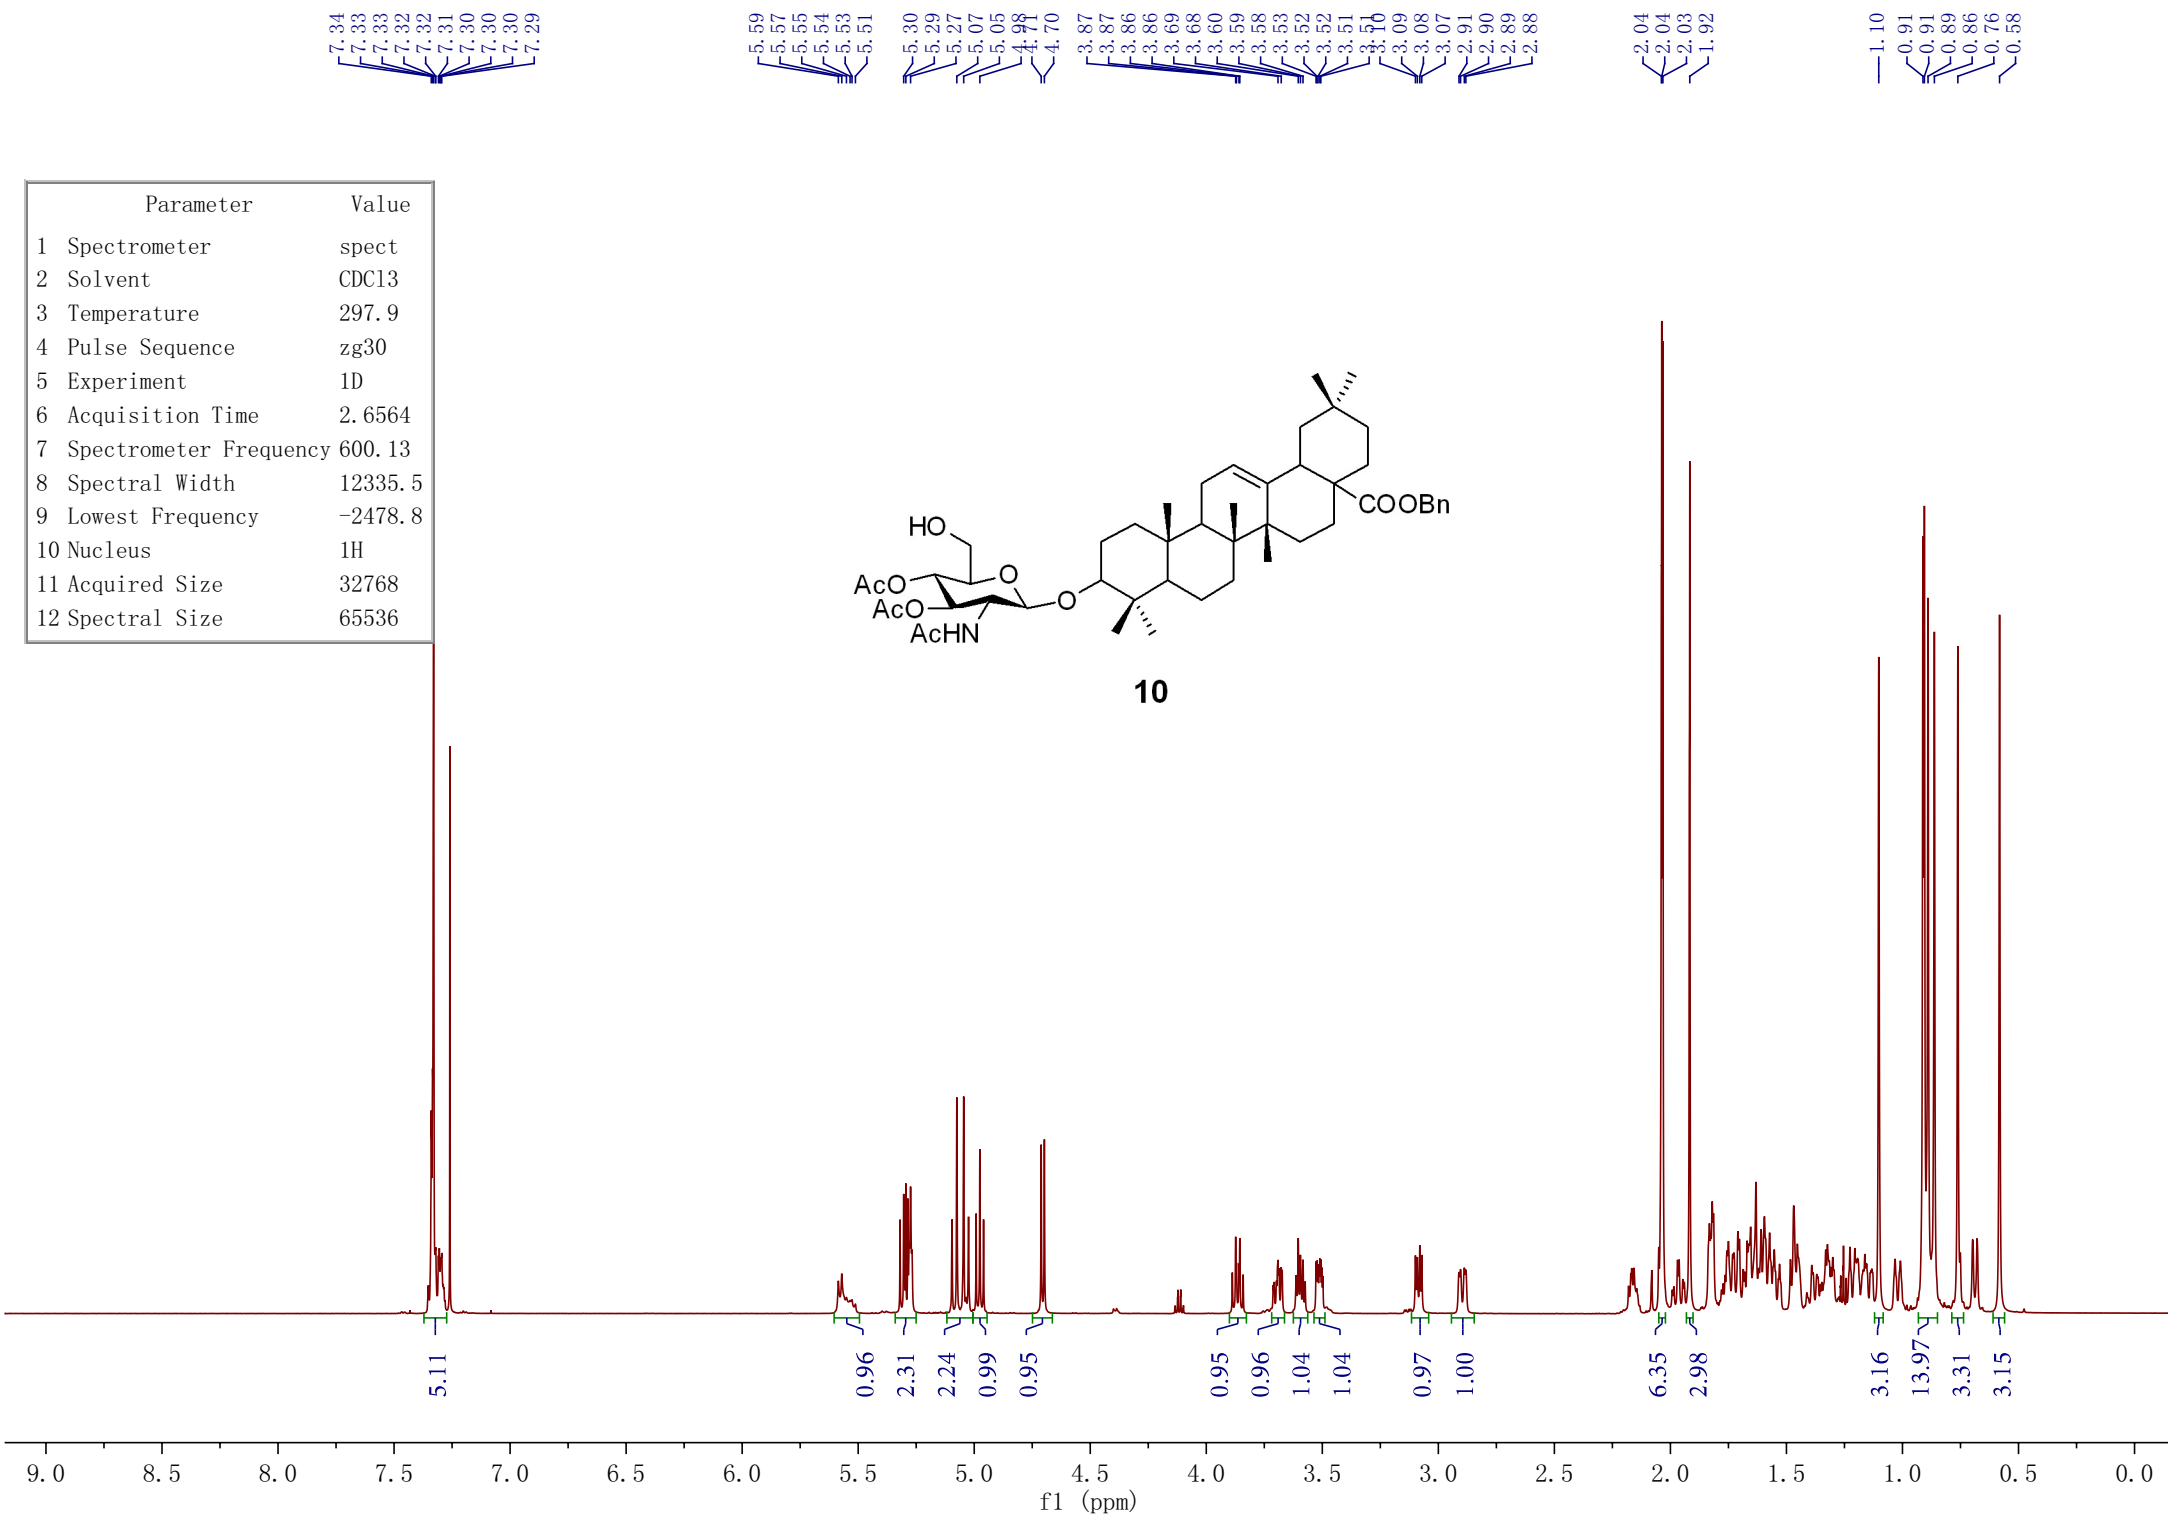

| Parameter                | Value           |
|--------------------------|-----------------|
| 1 Spectrometer           | spect           |
| 2 Solvent                | CDC13           |
| 3 Temperature            | 297.9           |
| 4 Pulse Sequence         | zgpg30          |
| 5 Experiment             | 1D              |
| 6 Acquisition Time       | 0.9044          |
| 7 Spectrometer Frequency | 150.90          |
| 8 Spectral Width         | 36231.9         |
| 9 Lowest Frequency       | -3041.0         |
| 10 Nucleus               | <sup>13</sup> C |
| 11 Acquired Size         | 32768           |
| 12 Spectral Size         | 65536           |

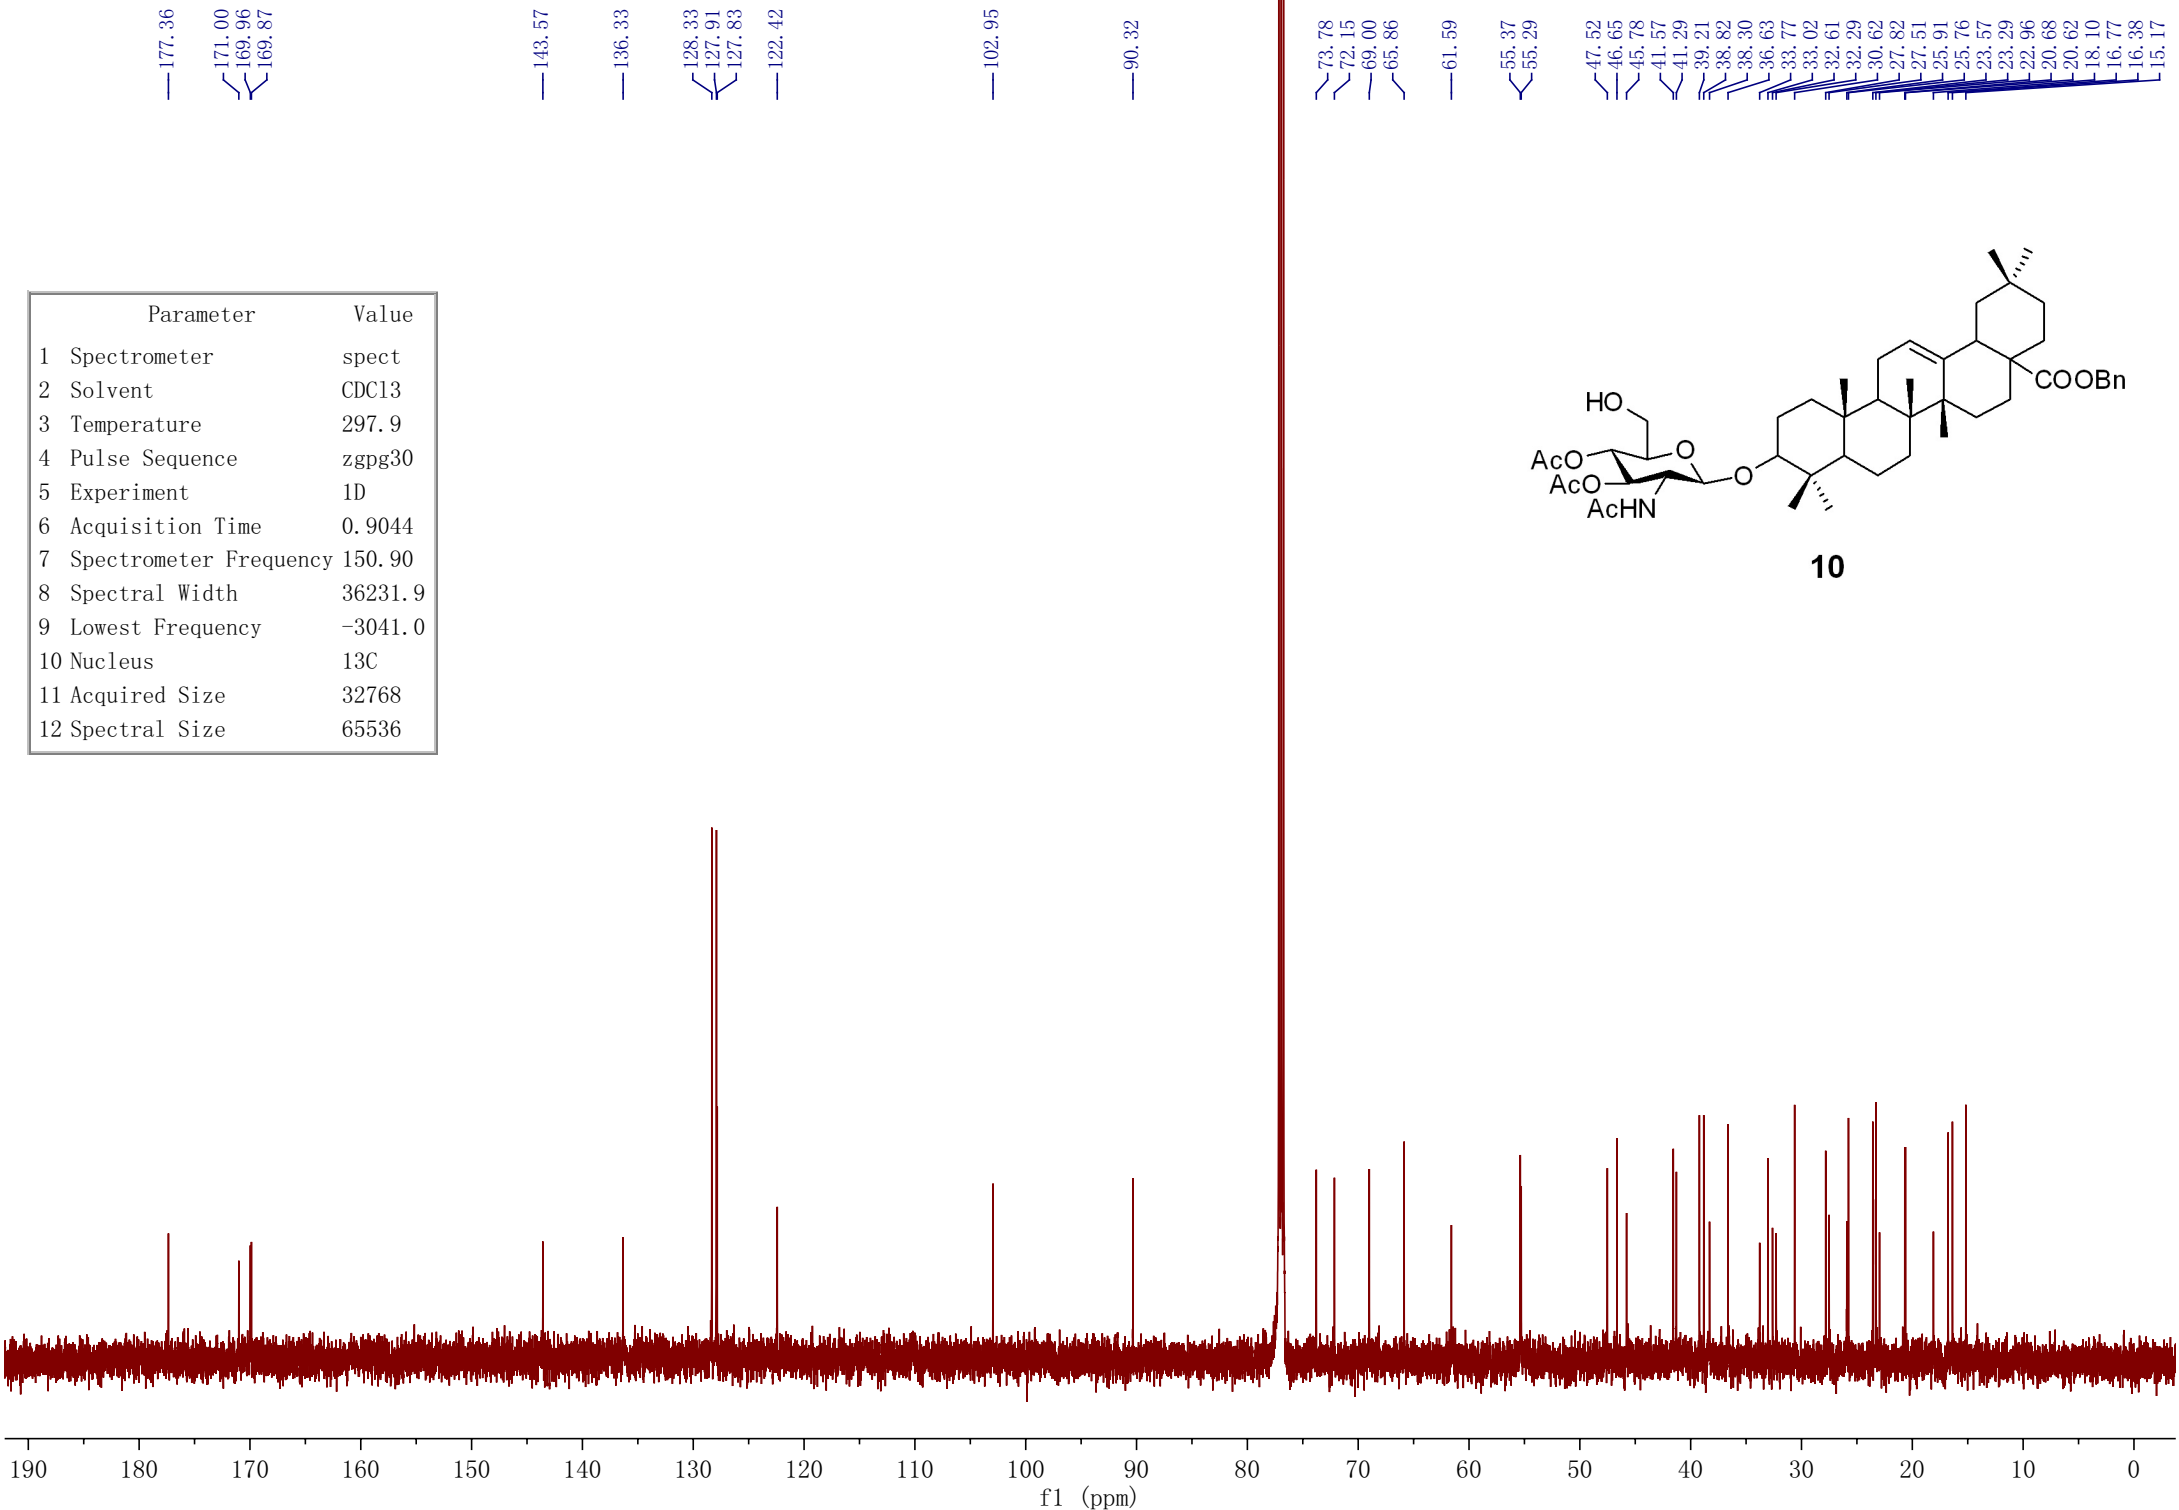

177.36  
171.00  
169.96  
169.87

143.57  
136.33

128.33  
127.91  
127.83  
122.42

102.95  
90.32

73.78  
72.15  
69.00  
65.86  
61.59

55.37  
55.29

47.52  
46.65  
45.78  
41.57  
41.29  
39.21  
38.82  
38.30  
36.63  
33.77  
33.02  
32.61  
32.29  
30.62  
27.82  
27.51  
25.91  
25.76  
23.57  
23.29  
22.96  
20.68  
20.62  
18.10  
16.77  
16.38  
15.17

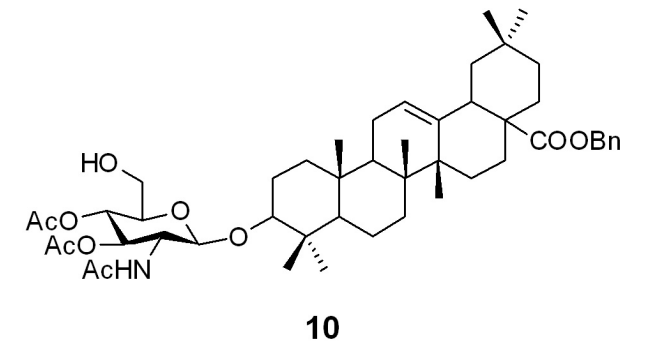



| Parameter                | Value           |
|--------------------------|-----------------|
| 1 Spectrometer           | spect           |
| 2 Solvent                | CDC13           |
| 3 Temperature            | 297.9           |
| 4 Pulse Sequence         | zgpg30          |
| 5 Experiment             | 1D              |
| 6 Acquisition Time       | 0.9044          |
| 7 Spectrometer Frequency | 150.90          |
| 8 Spectral Width         | 36231.9         |
| 9 Lowest Frequency       | -3041.0         |
| 10 Nucleus               | <sup>13</sup> C |
| 11 Acquired Size         | 32768           |
| 12 Spectral Size         | 65536           |

177.38  
171.04  
169.73  
169.41  
165.53  
165.26  
165.11

143.17  
133.32  
129.83  
129.78  
129.68  
128.47  
128.44  
128.41  
128.32  
127.99  
127.75

103.23  
99.90

90.33

78.45  
72.23  
69.84  
69.10  
67.85  
67.41  
65.85  
65.49  
55.35  
55.09  
53.36  
47.44  
46.63  
45.77  
41.51  
41.25  
39.17  
38.85  
36.59  
33.10  
30.63  
29.62  
27.74  
25.69  
23.58  
23.28  
20.64  
20.61  
16.77  
16.34  
15.87  
15.80

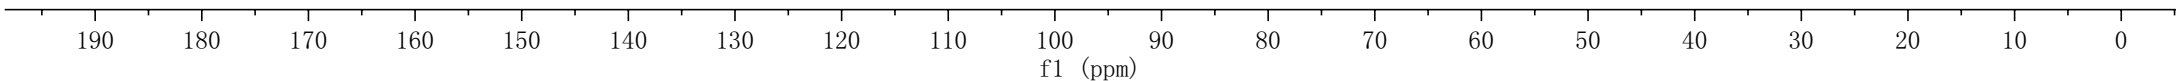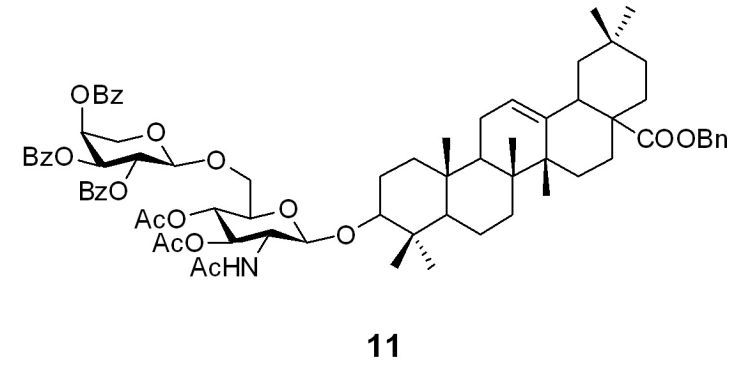



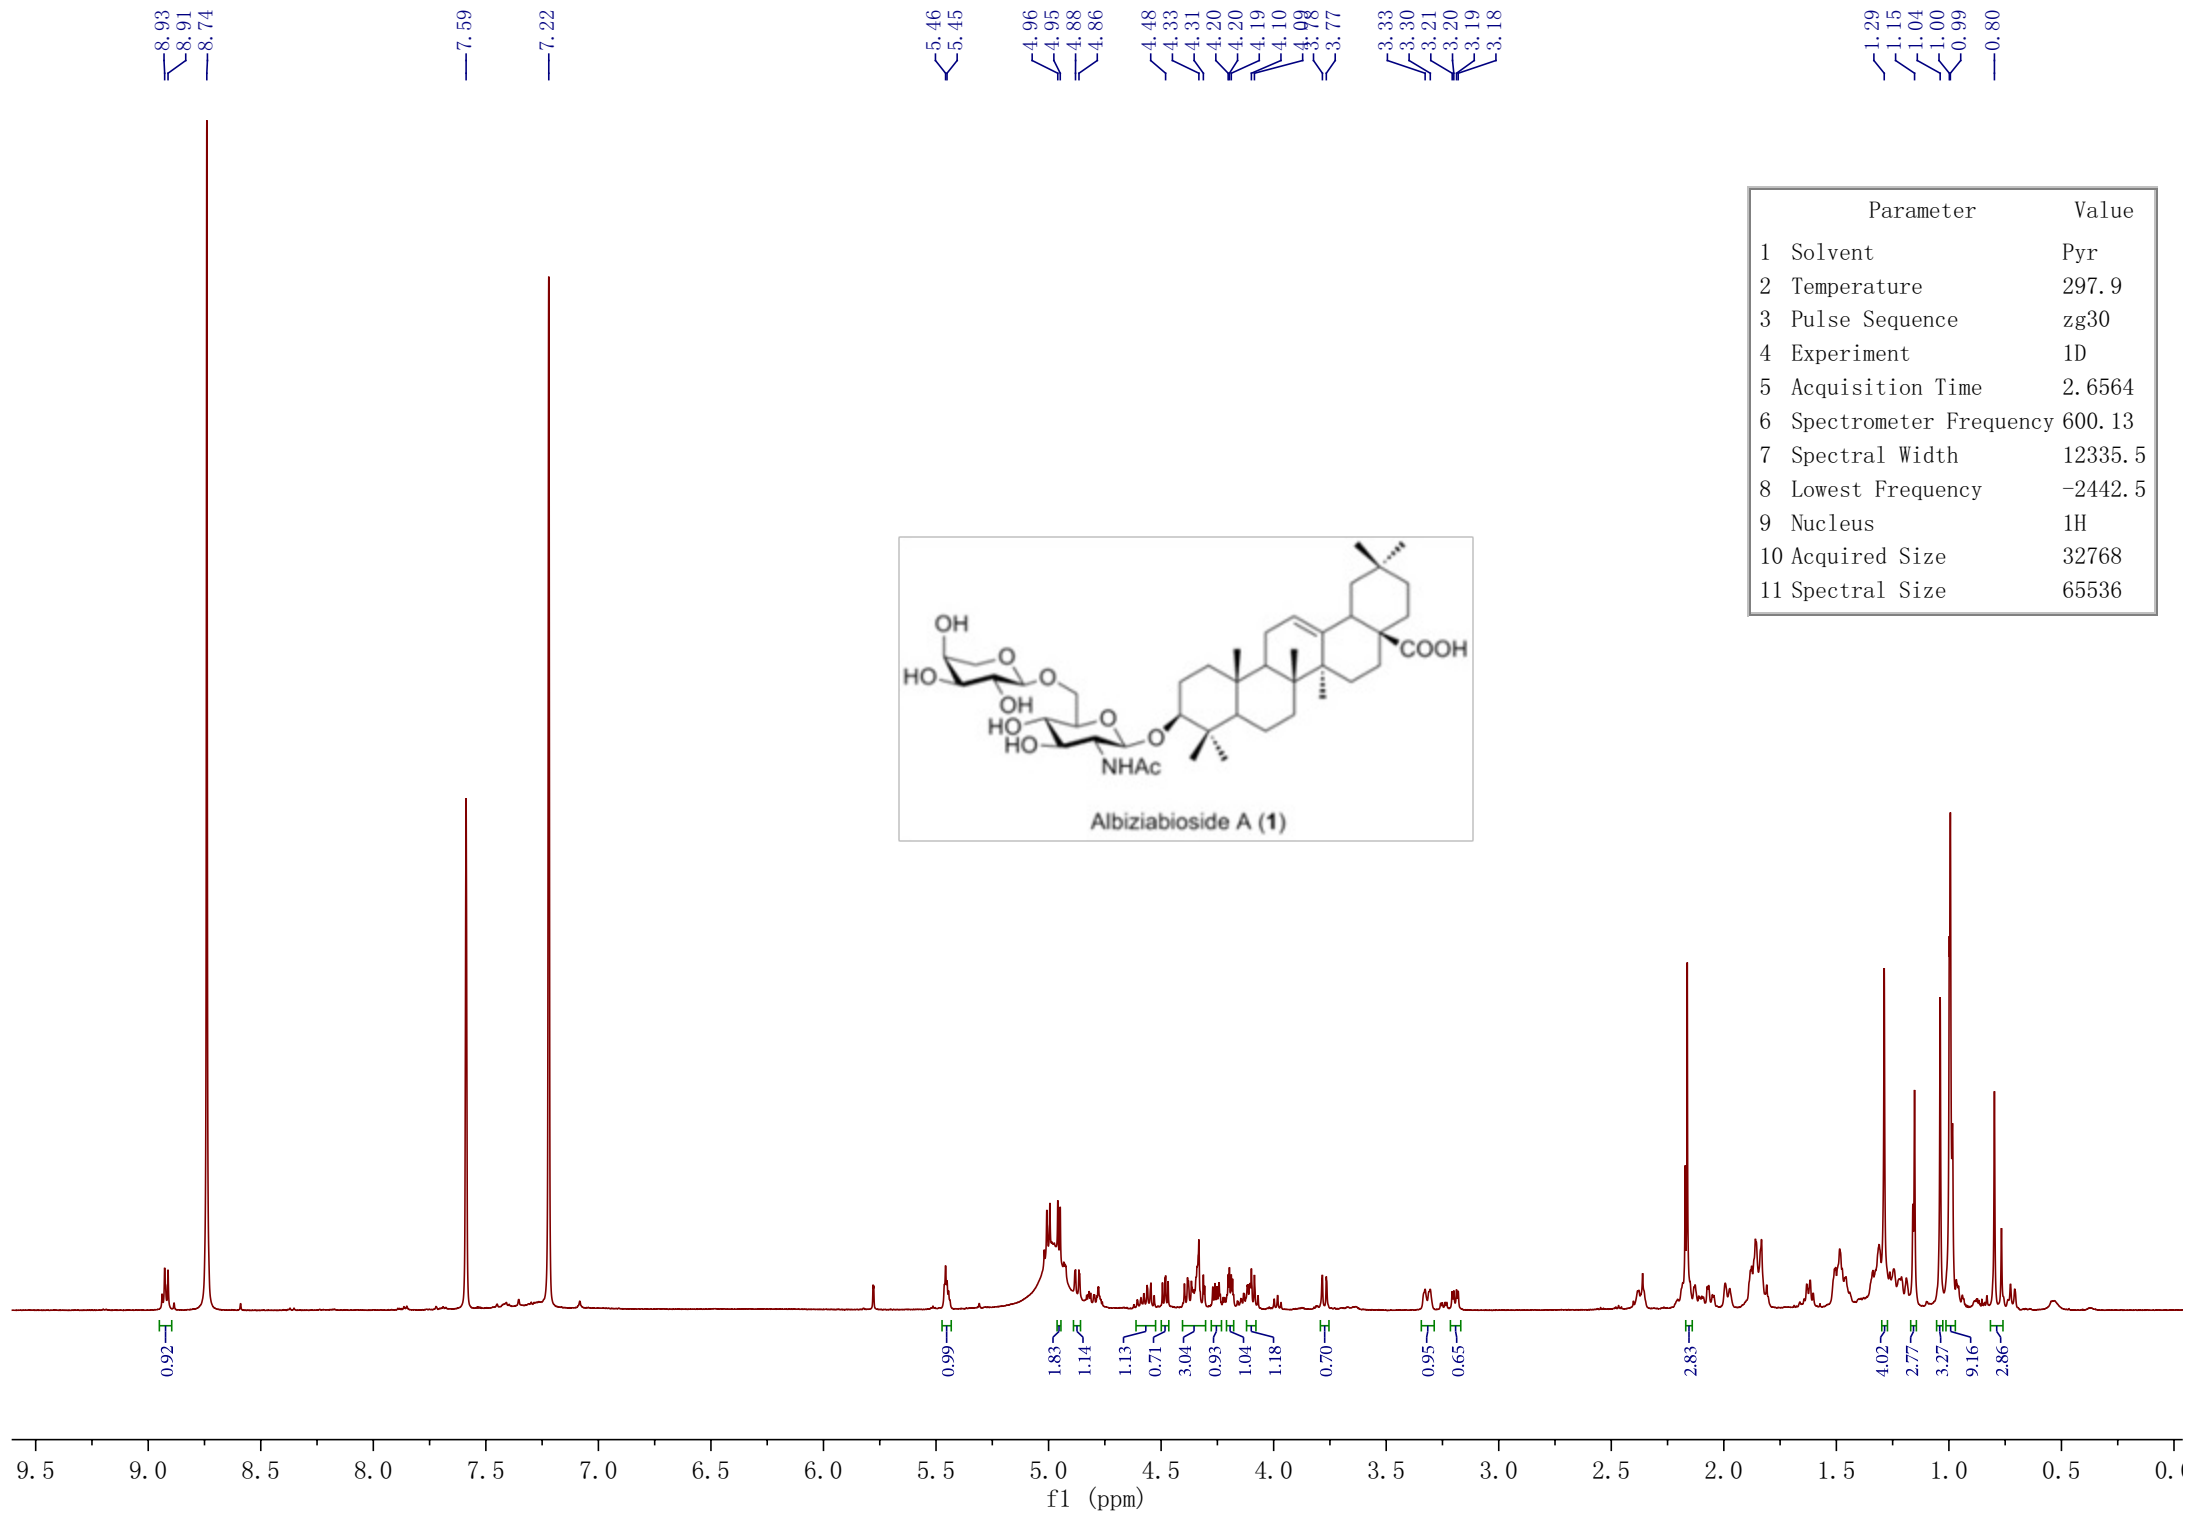

| Parameter                | Value   |
|--------------------------|---------|
| 1 Solvent                | Pyr     |
| 2 Temperature            | 297.9   |
| 3 Pulse Sequence         | zg30    |
| 4 Experiment             | 1D      |
| 5 Acquisition Time       | 2.6564  |
| 6 Spectrometer Frequency | 600.13  |
| 7 Spectral Width         | 12335.5 |
| 8 Lowest Frequency       | -2442.5 |
| 9 Nucleus                | 1H      |
| 10 Acquired Size         | 32768   |
| 11 Spectral Size         | 65536   |
